# Supplementary figures and images for: Supramolecular one-pot approach to fluorescent glycodendrimers
Source: Royal Society of Chemistry journal article supplement (doi:10.1039/b802177e), 2008-01-01

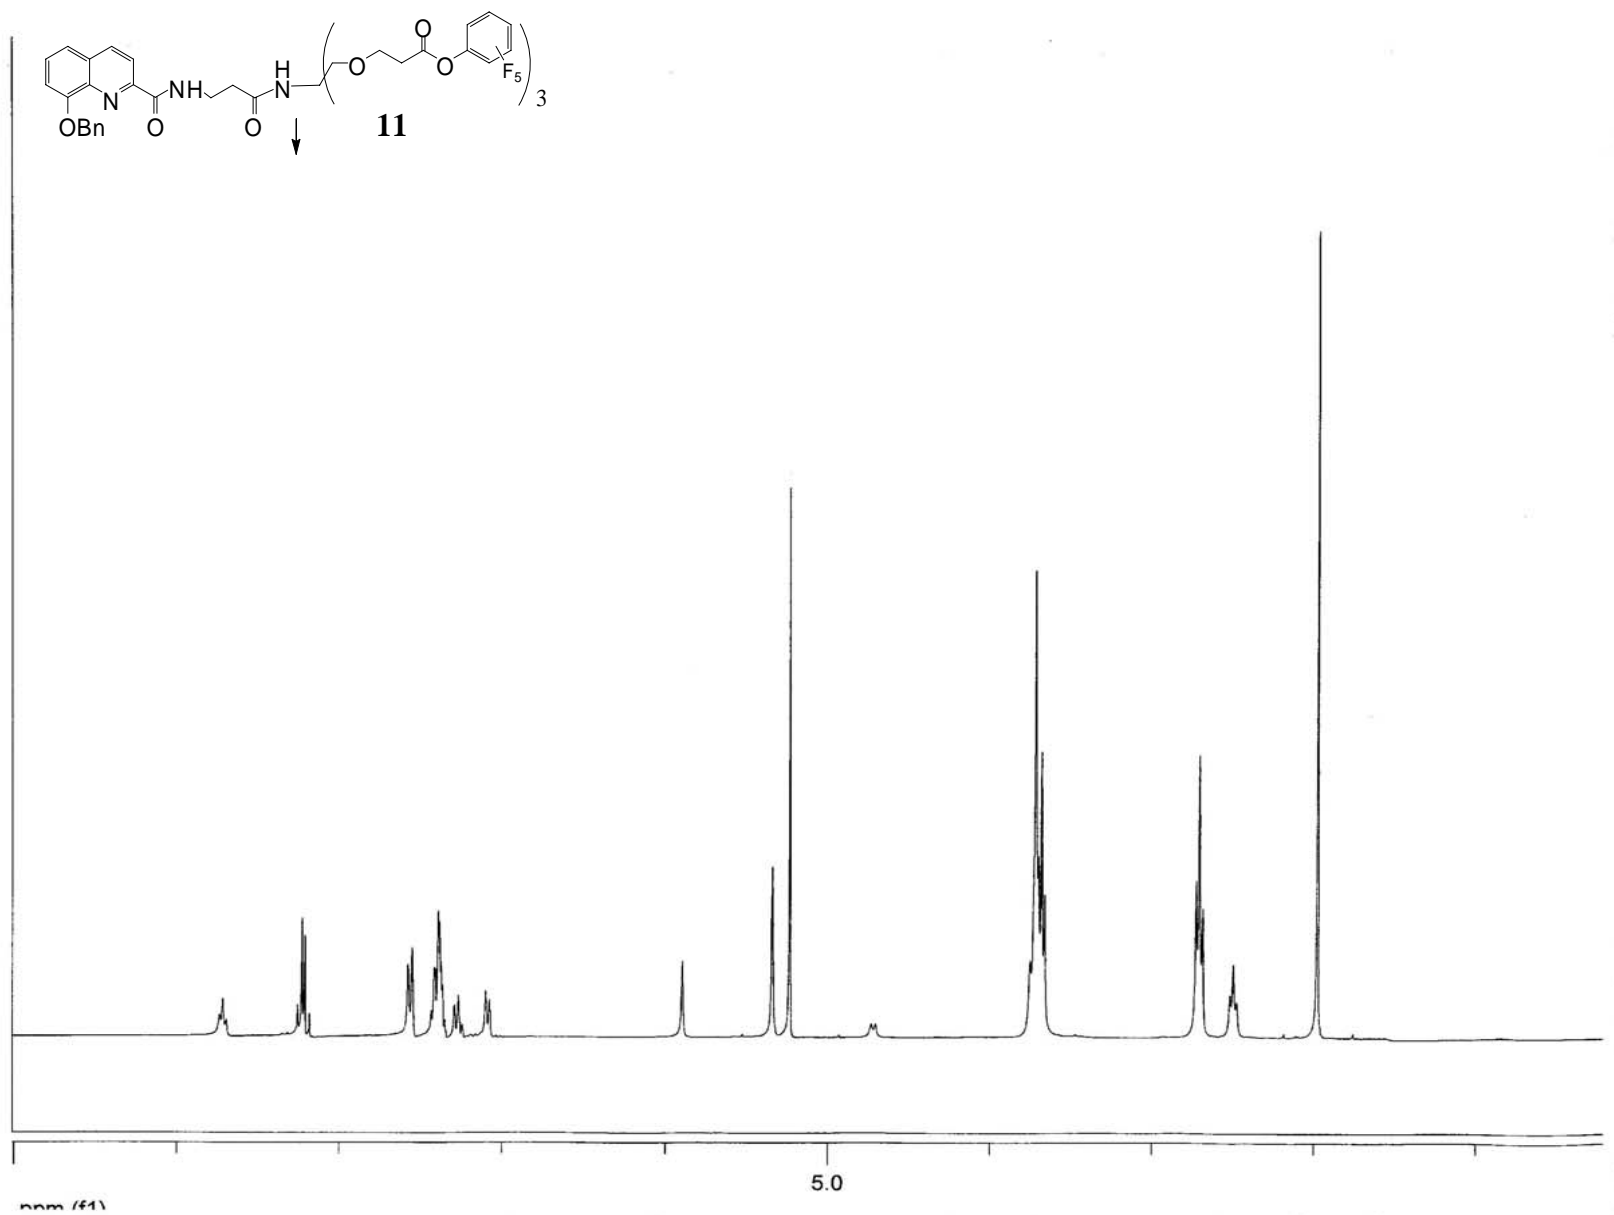

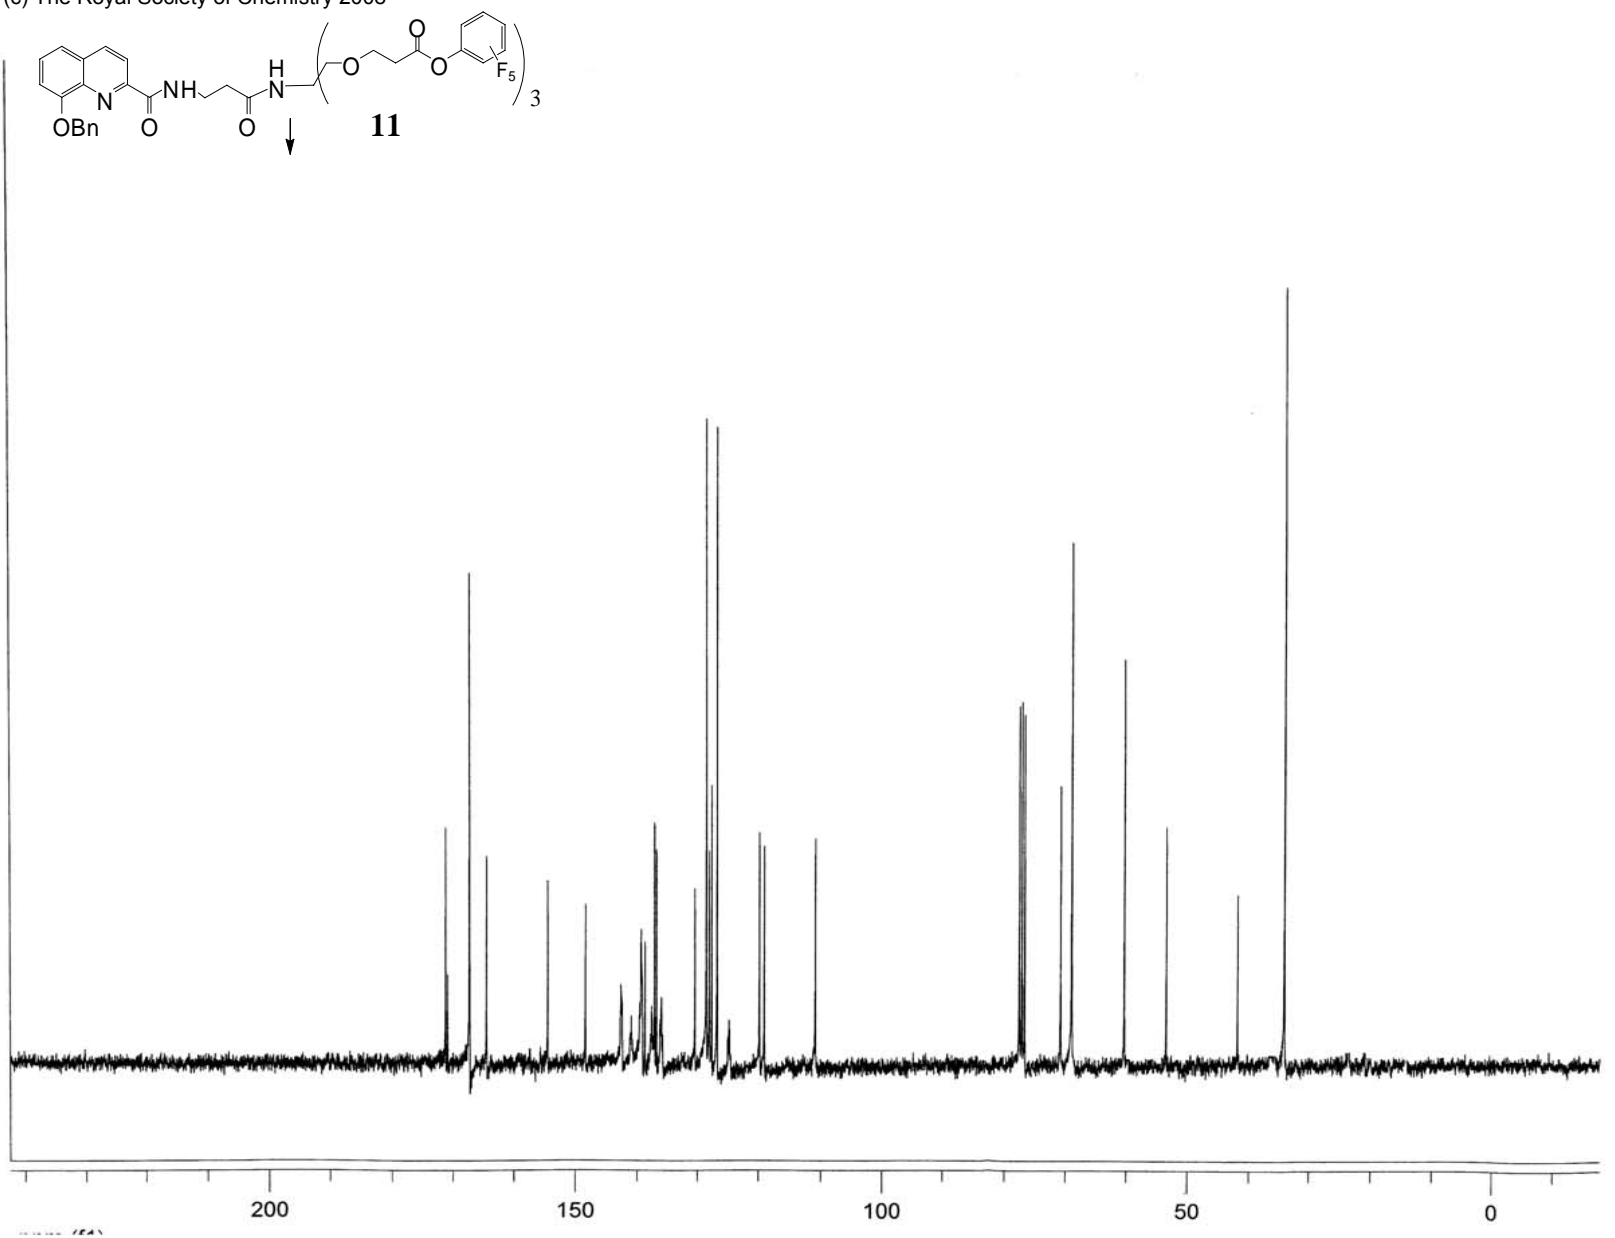

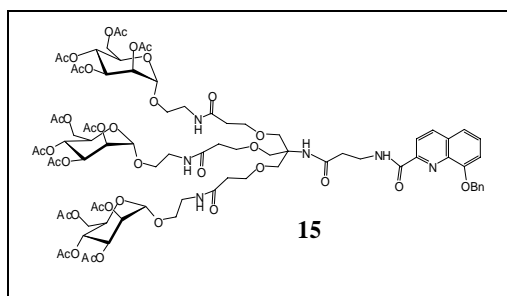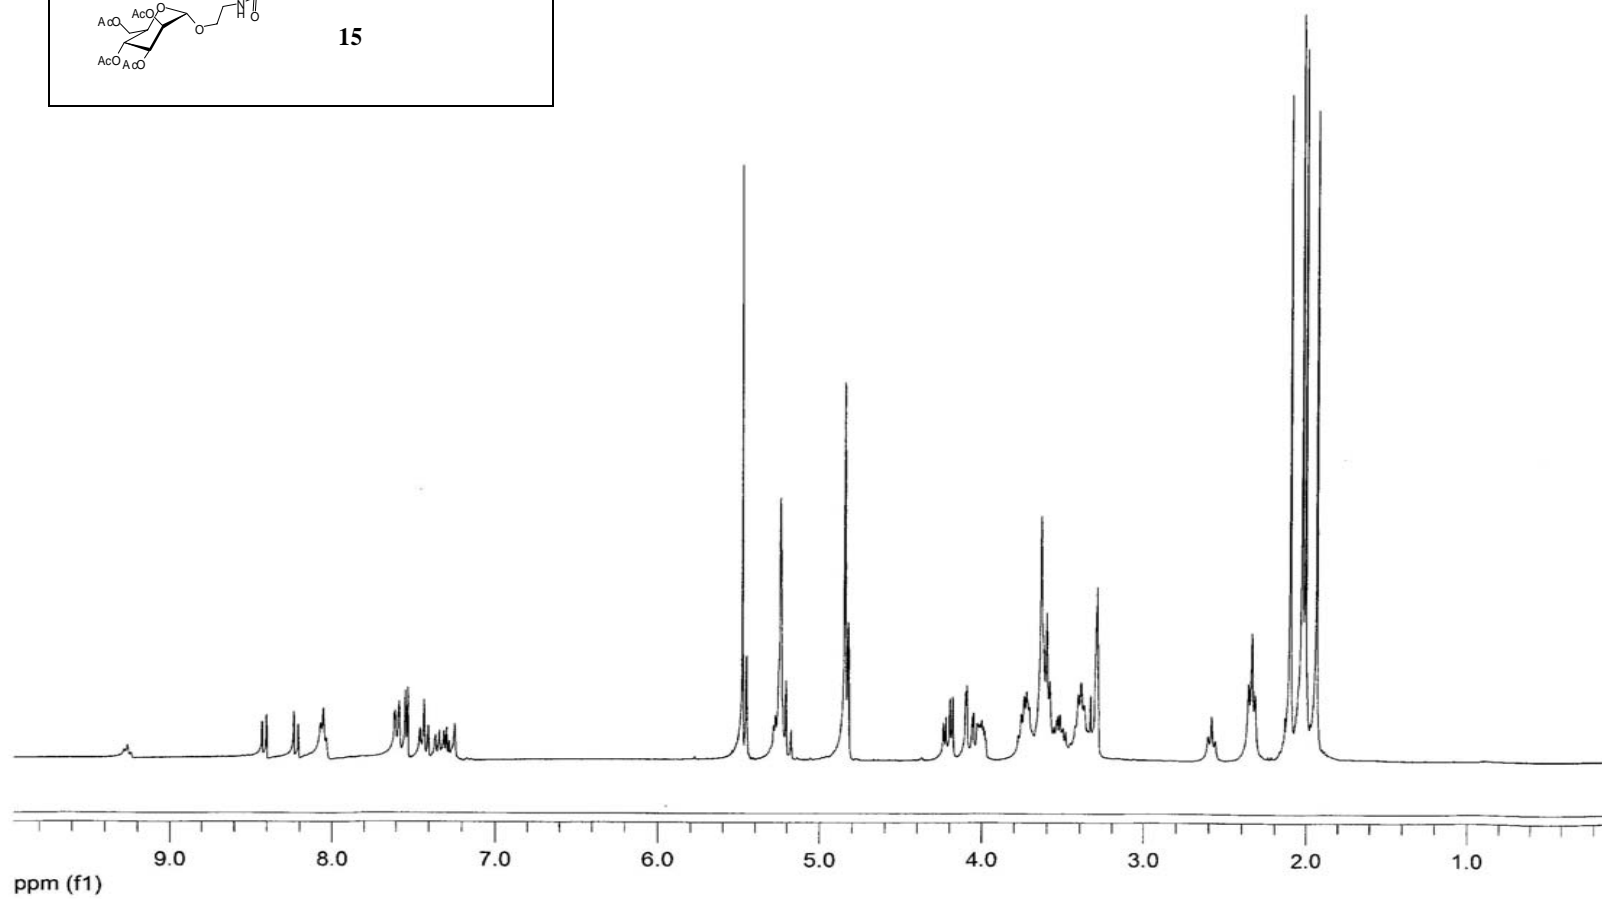

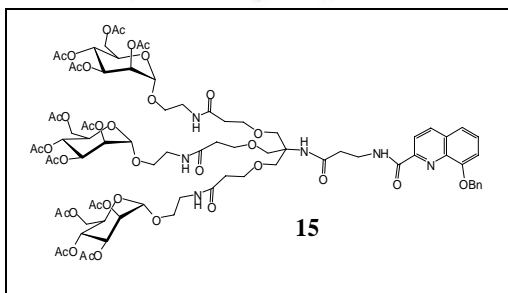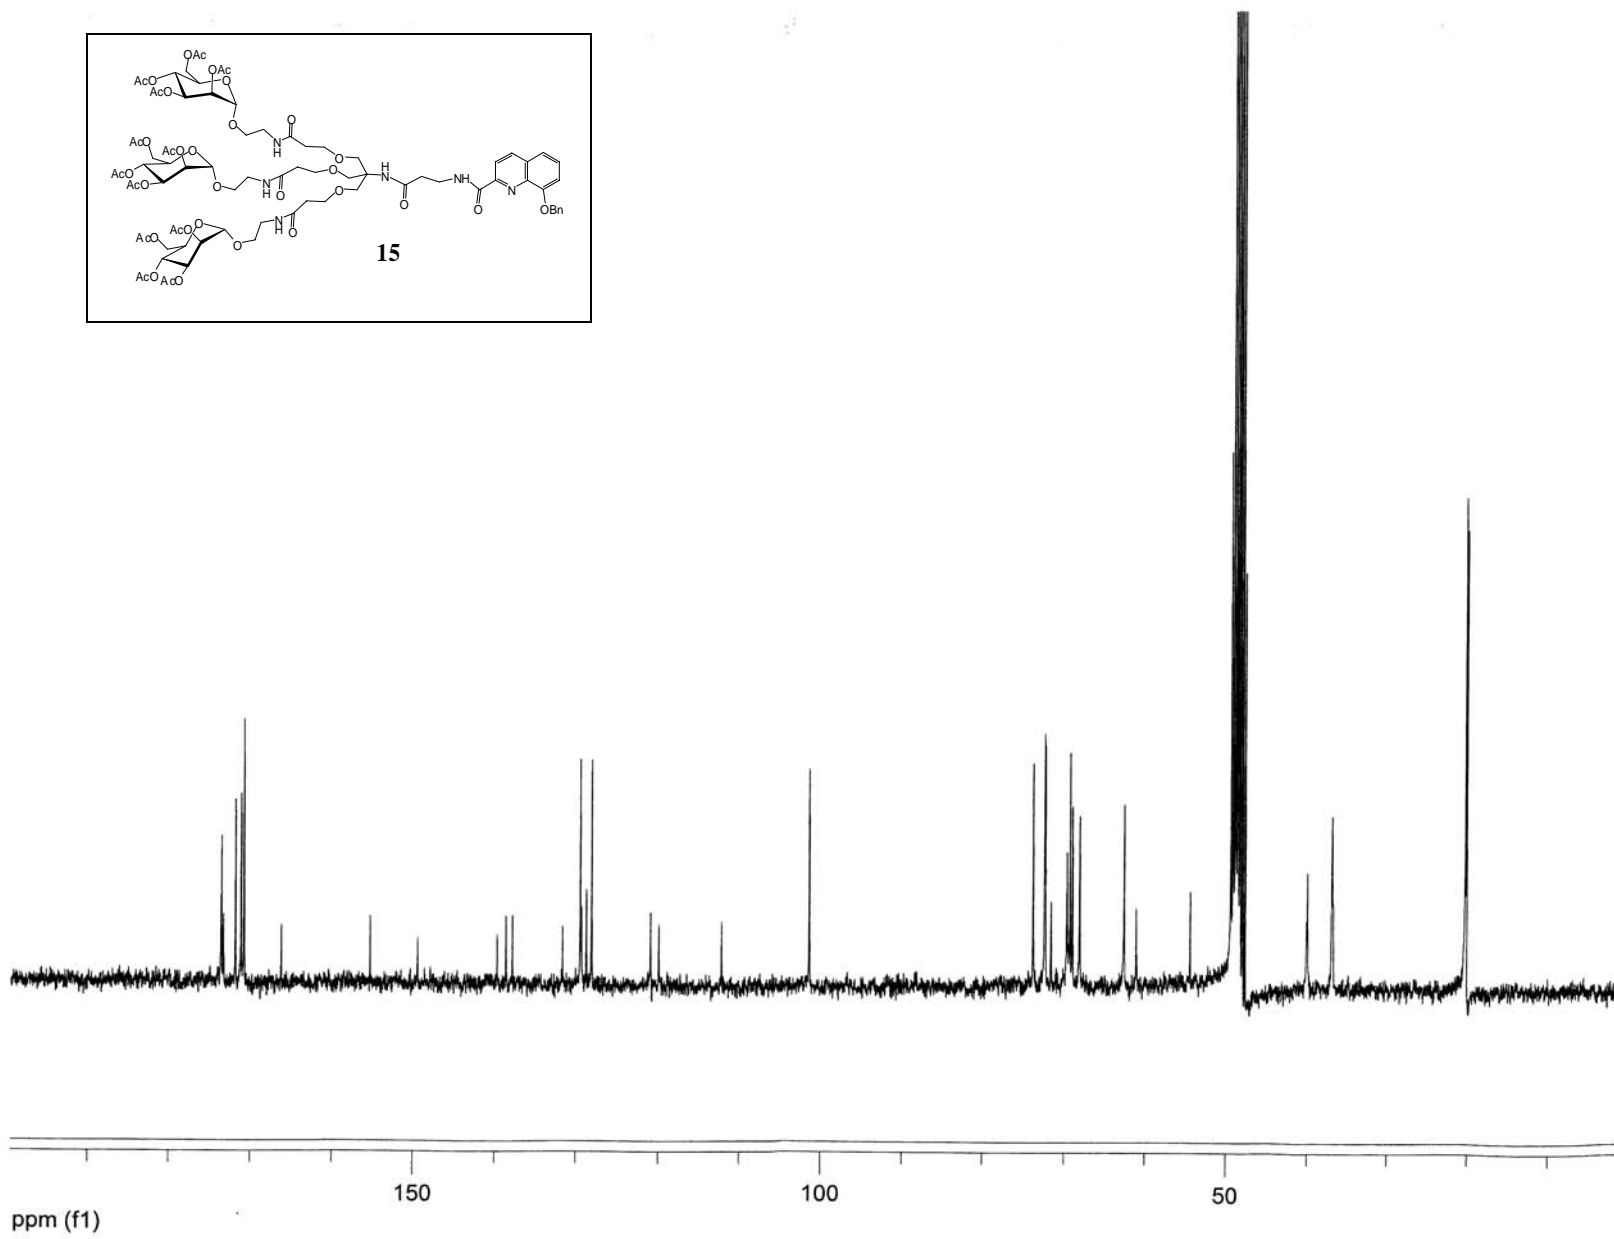

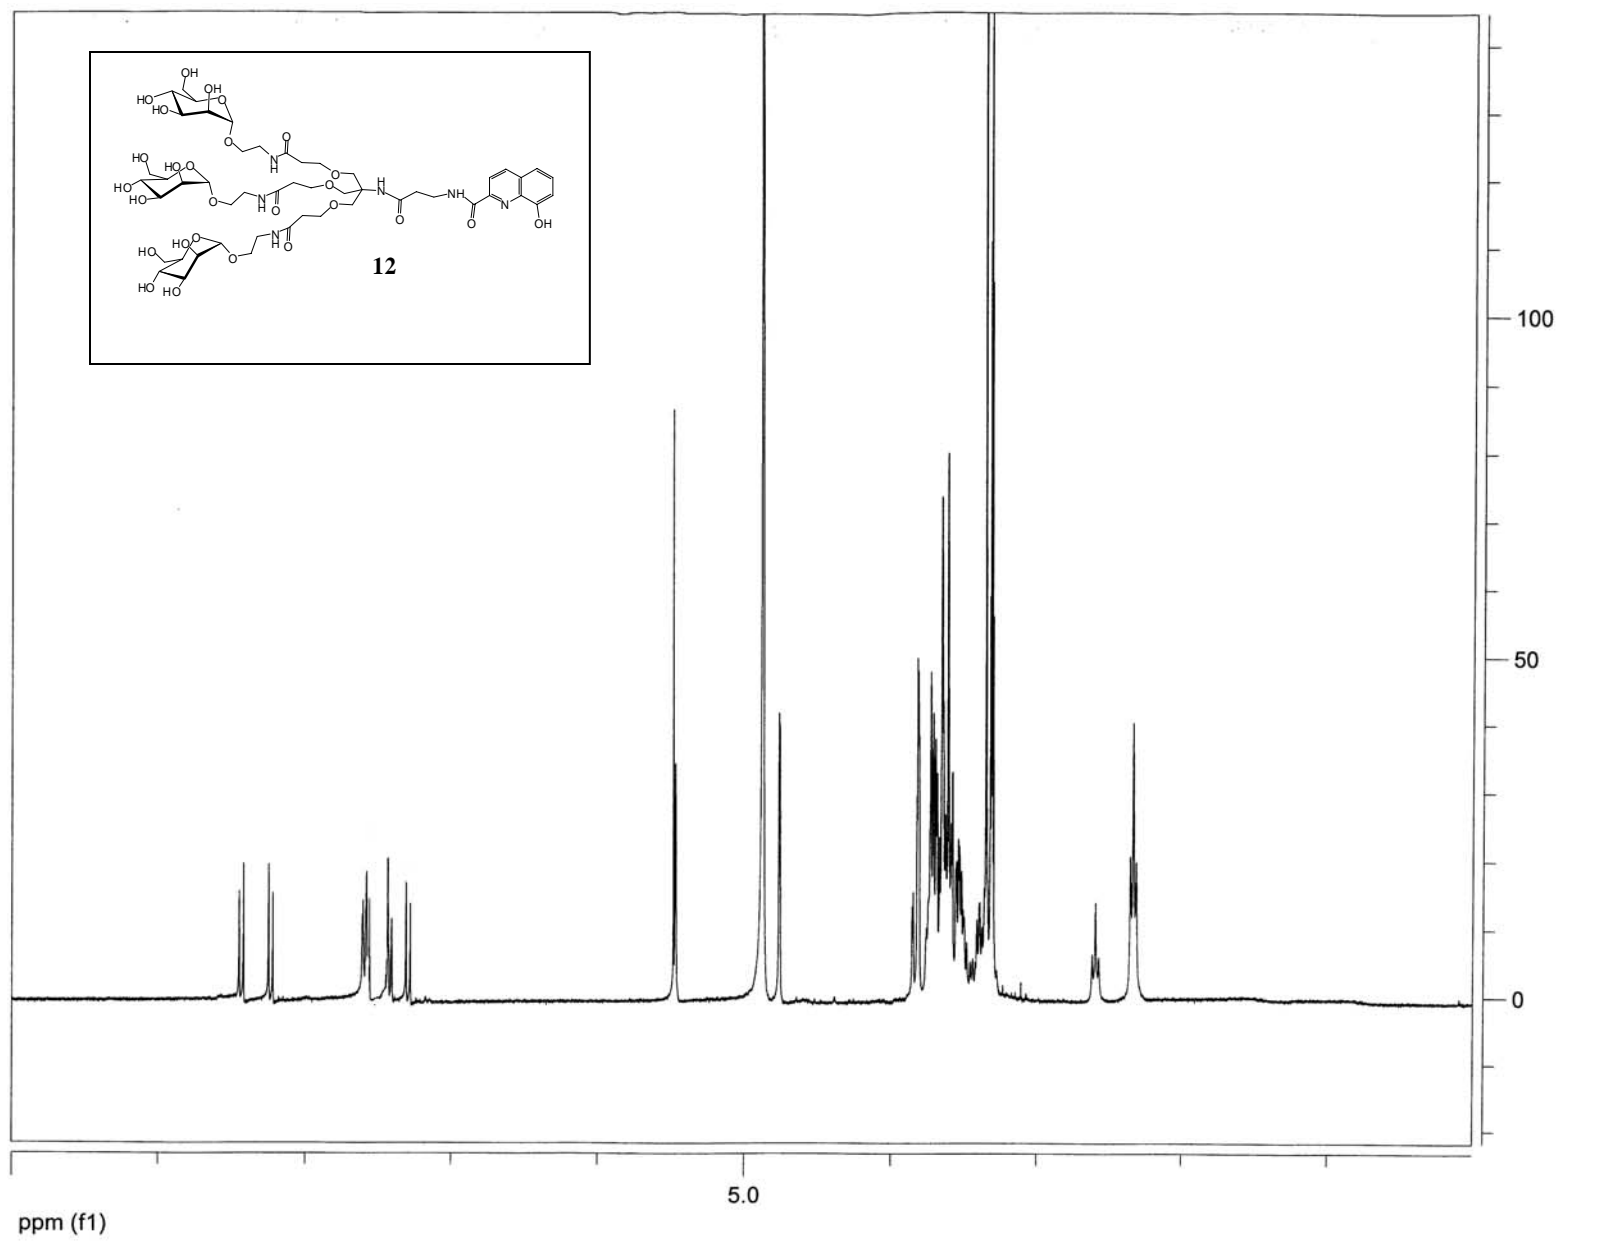

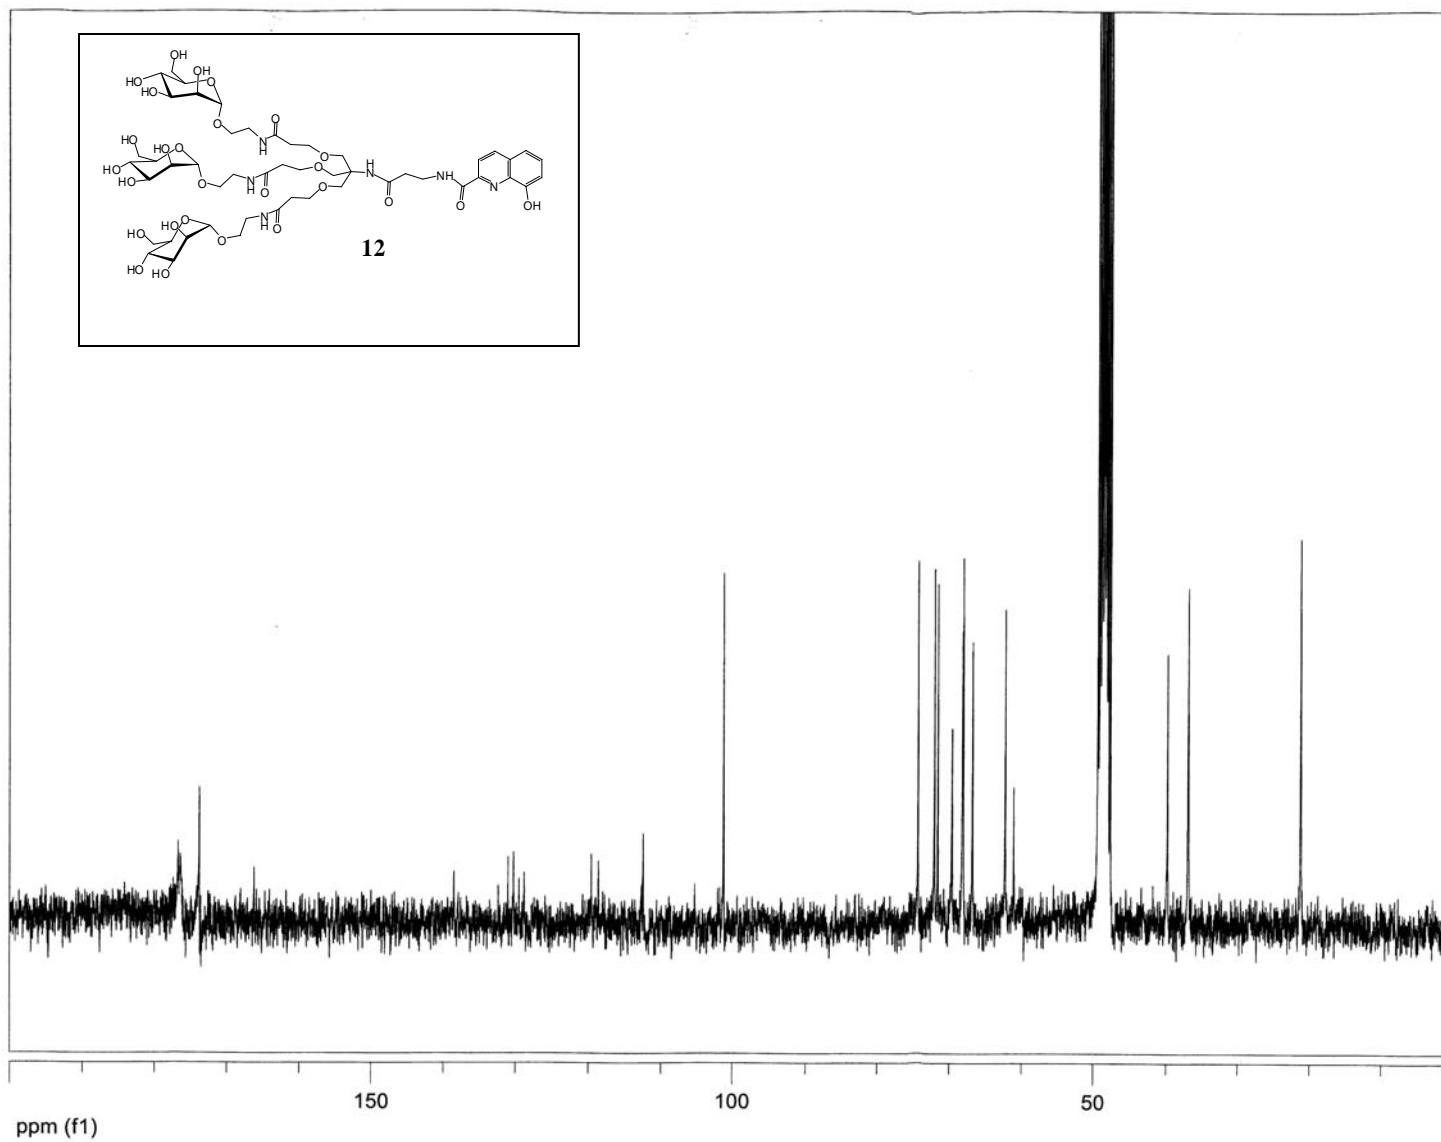

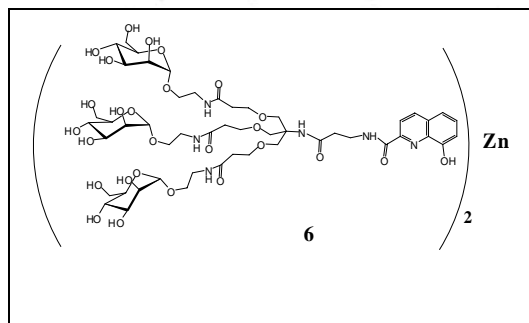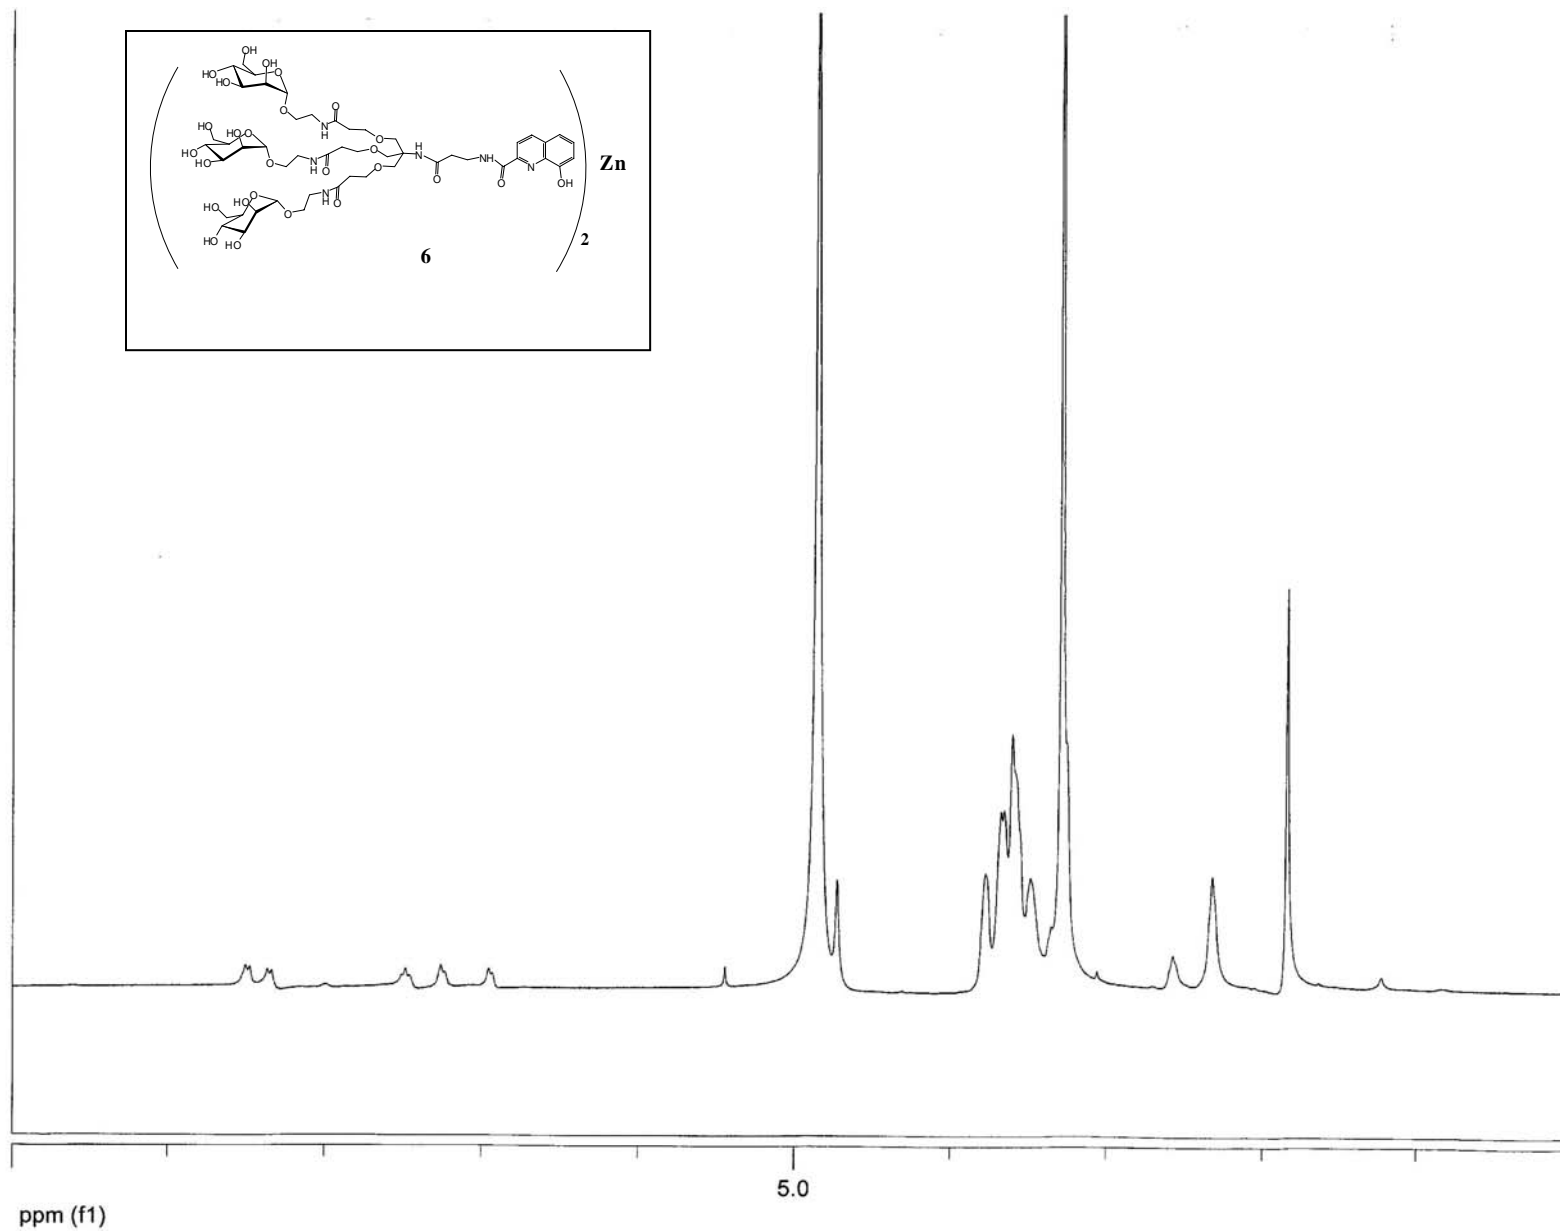

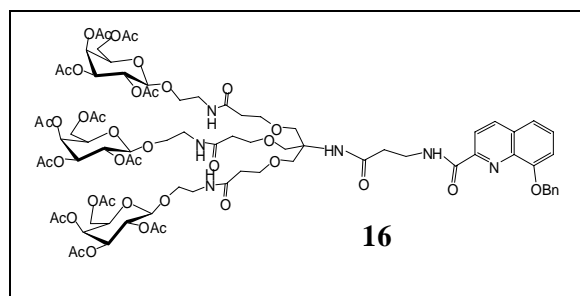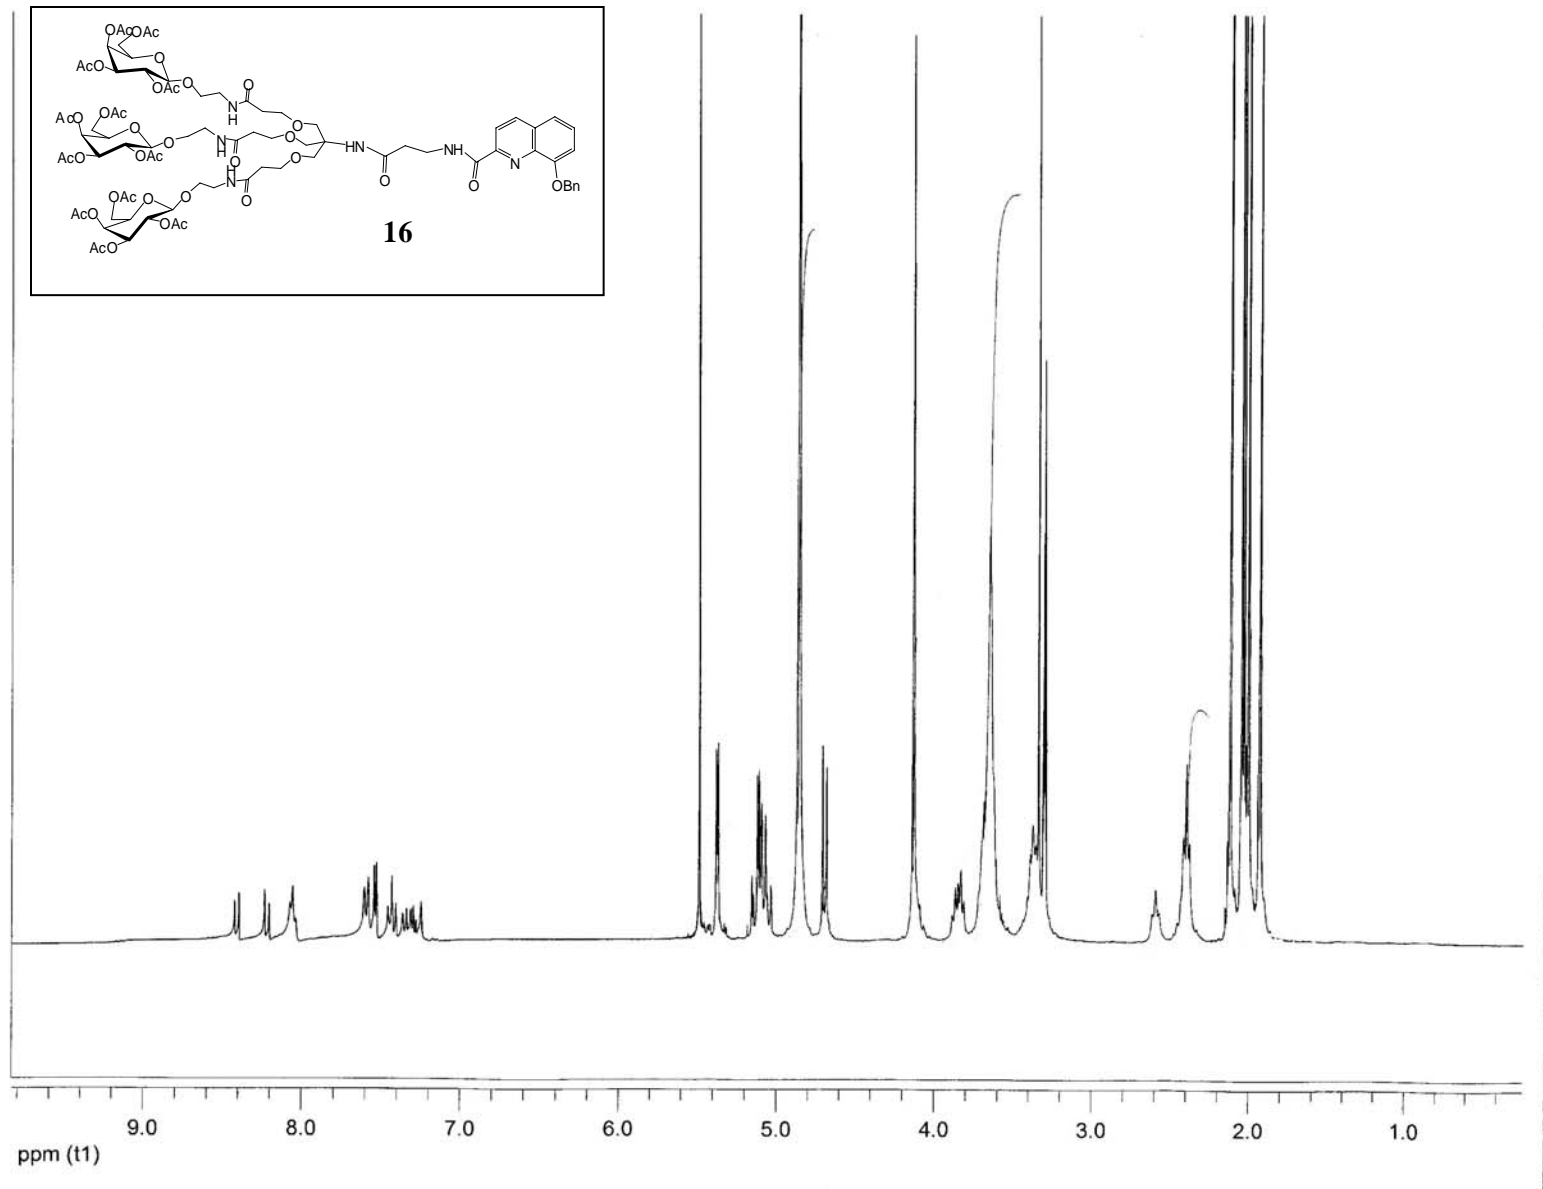



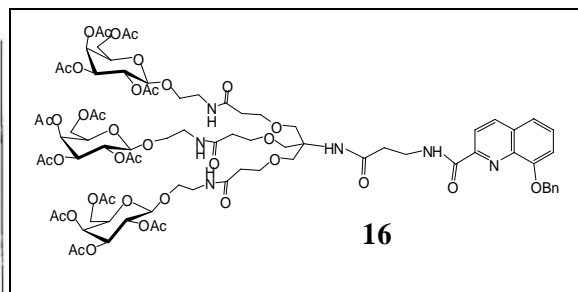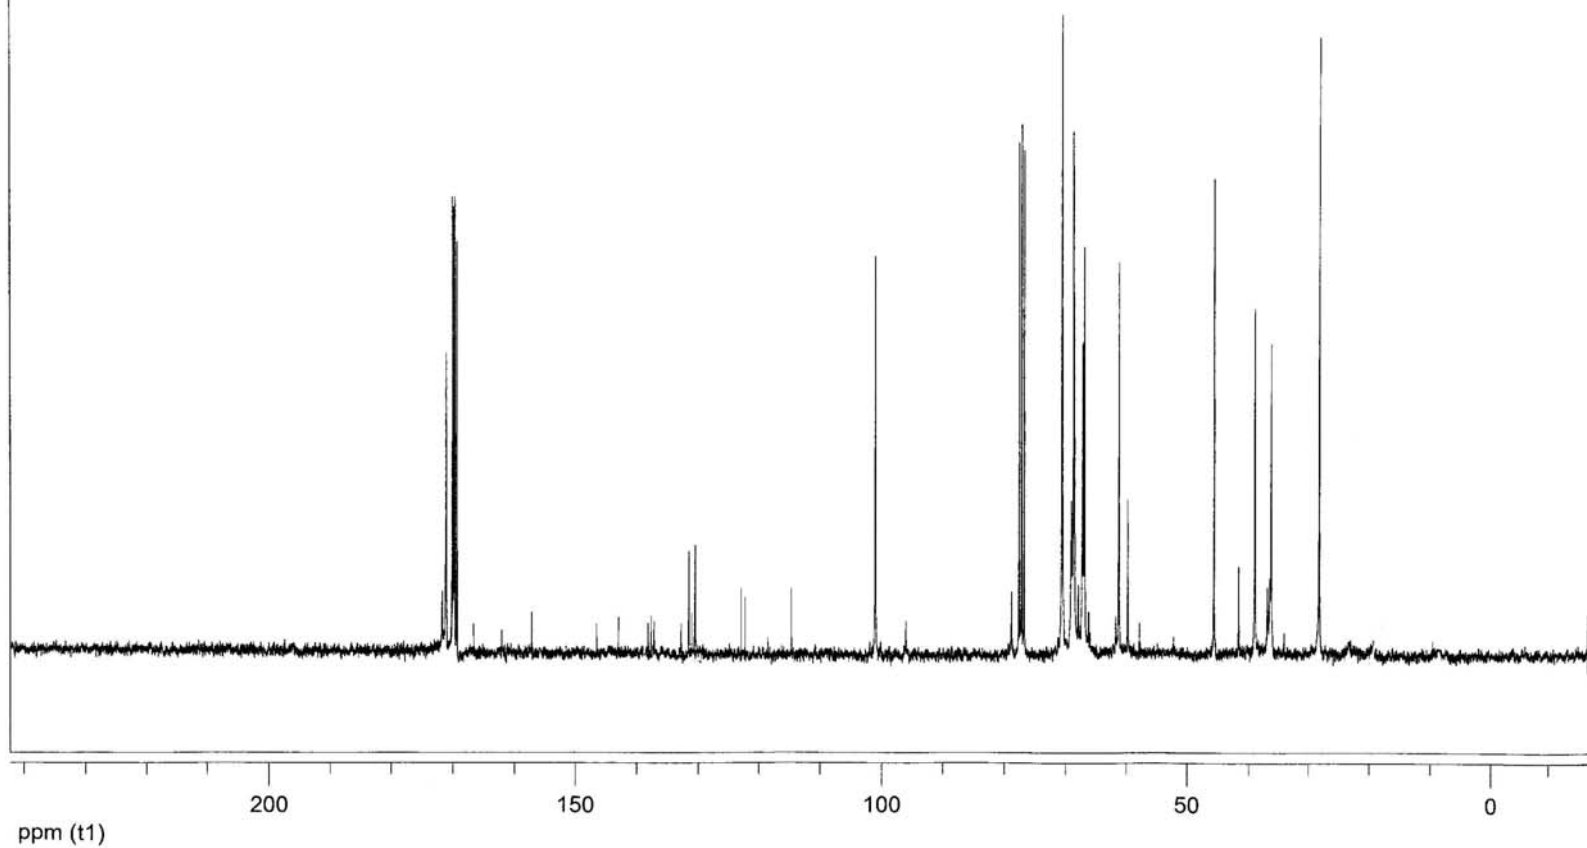

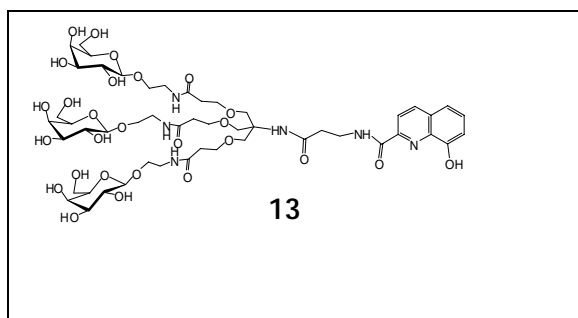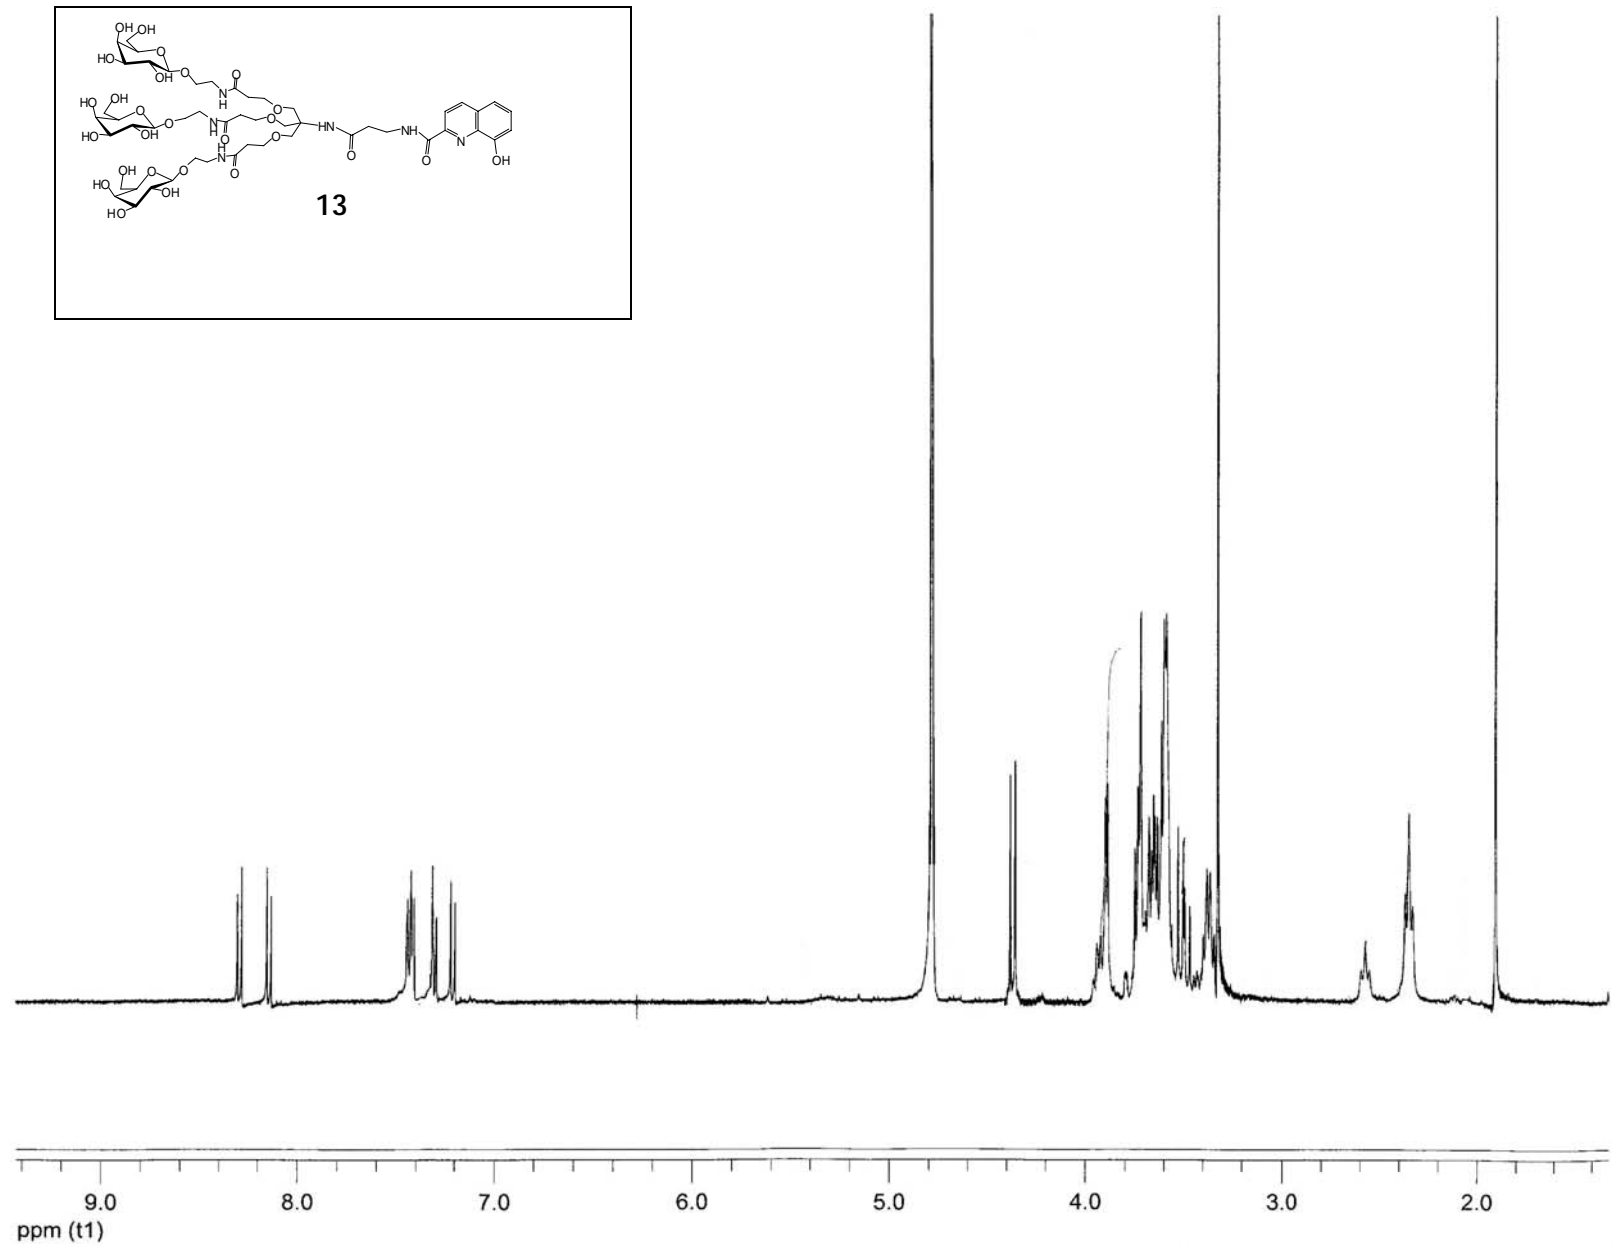

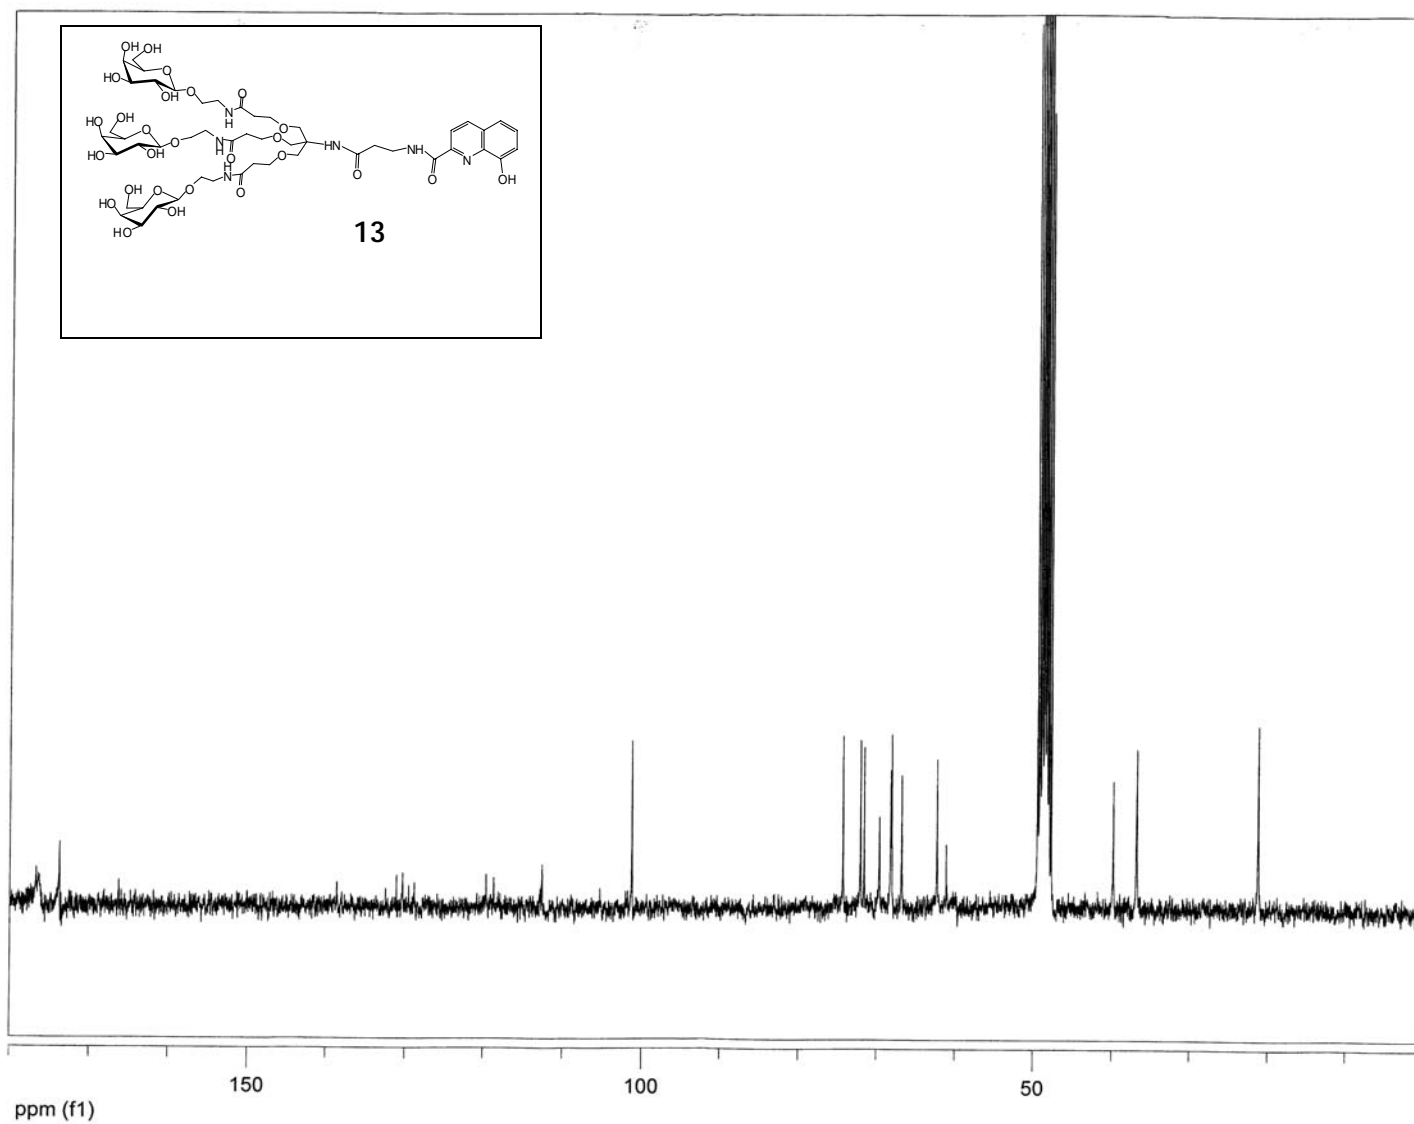

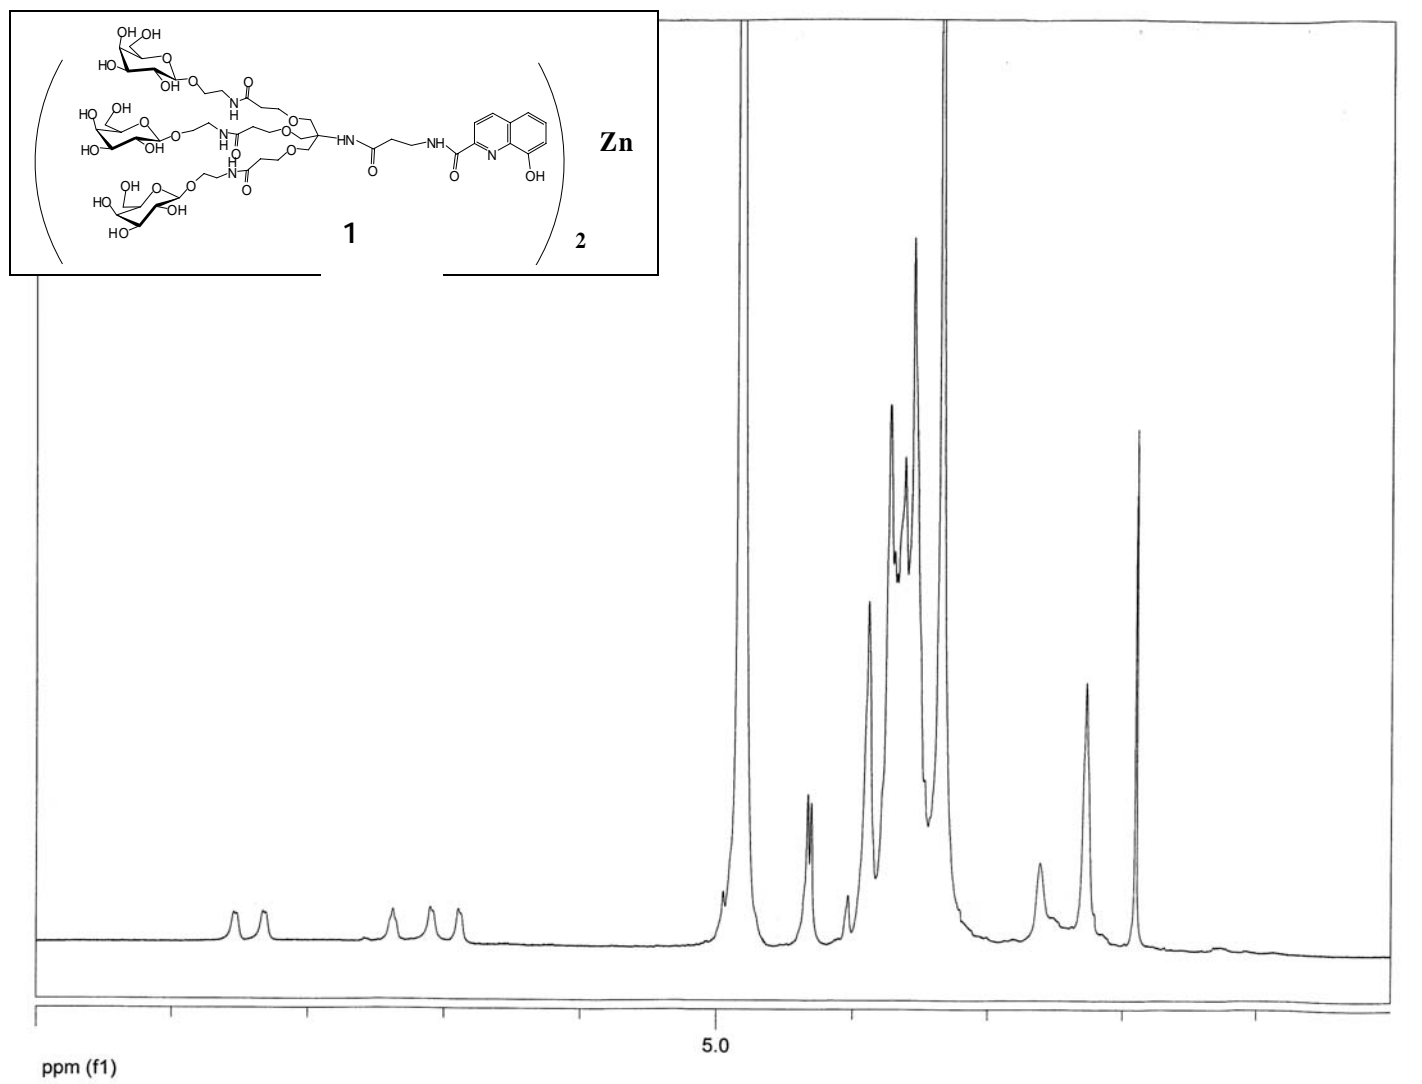

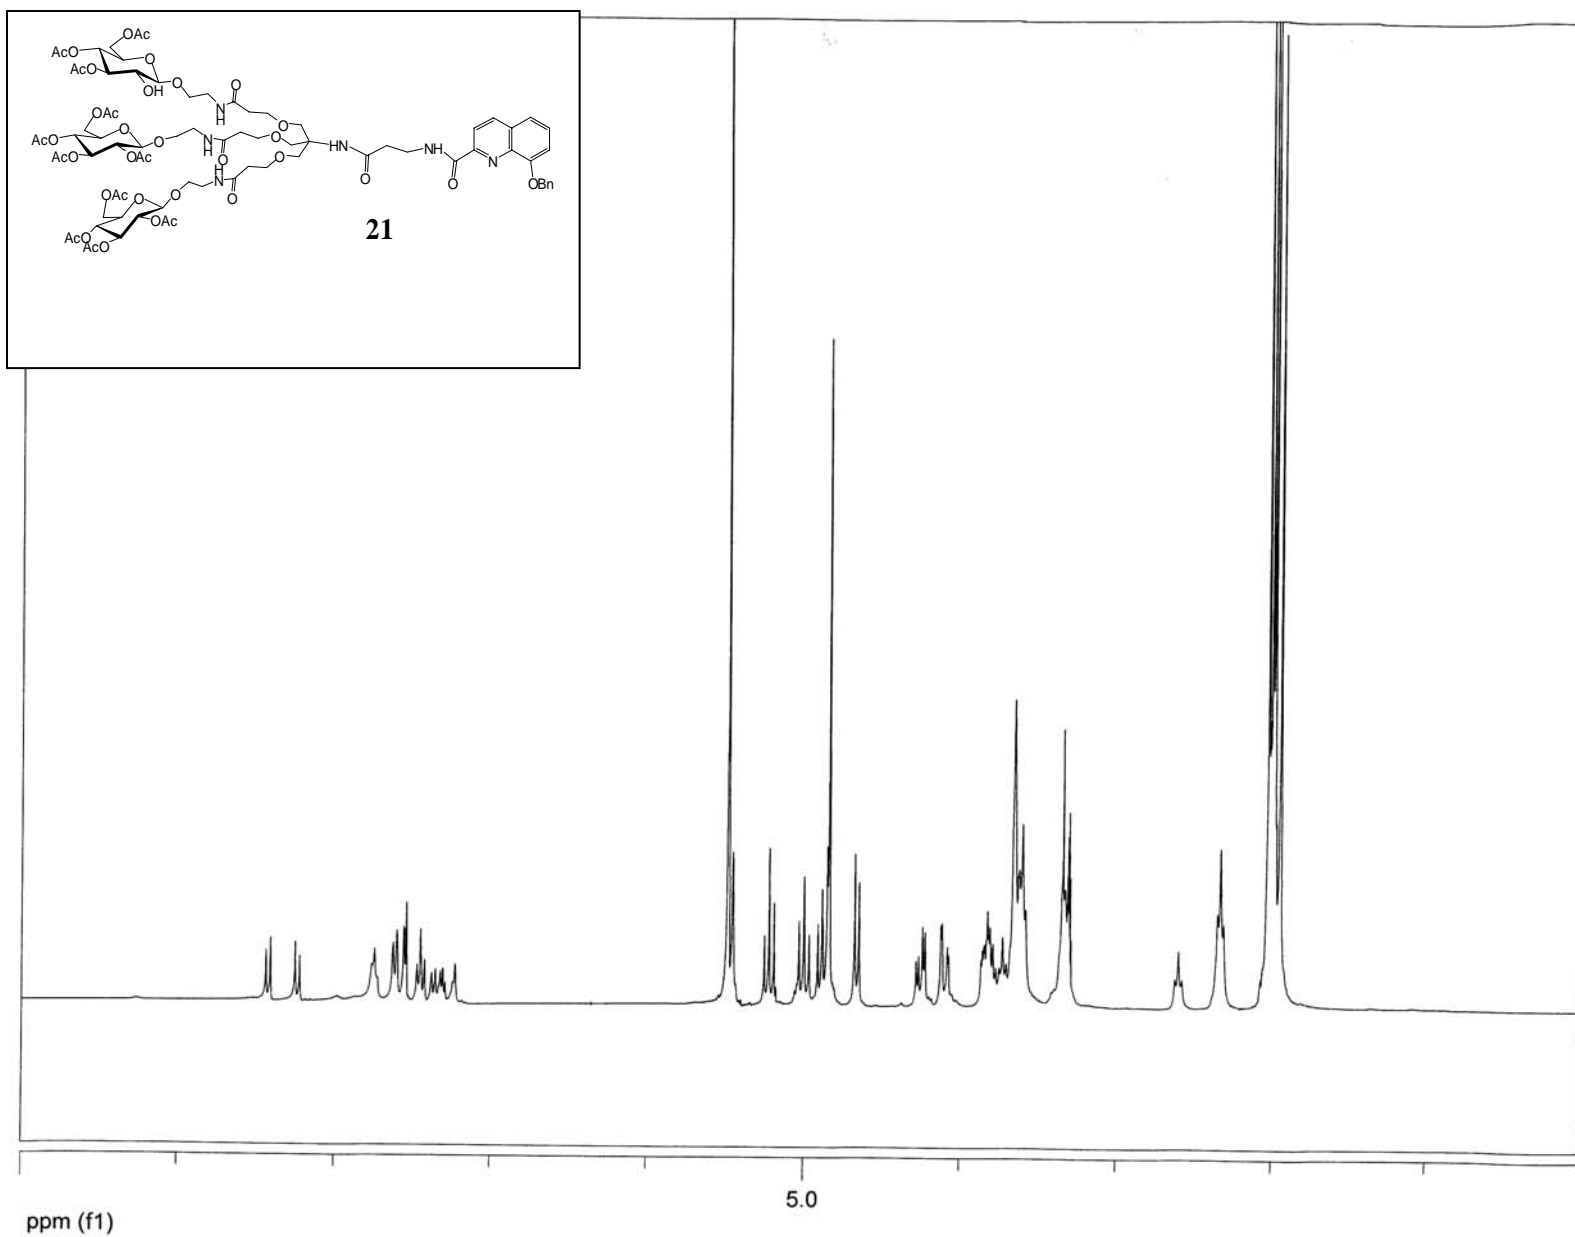

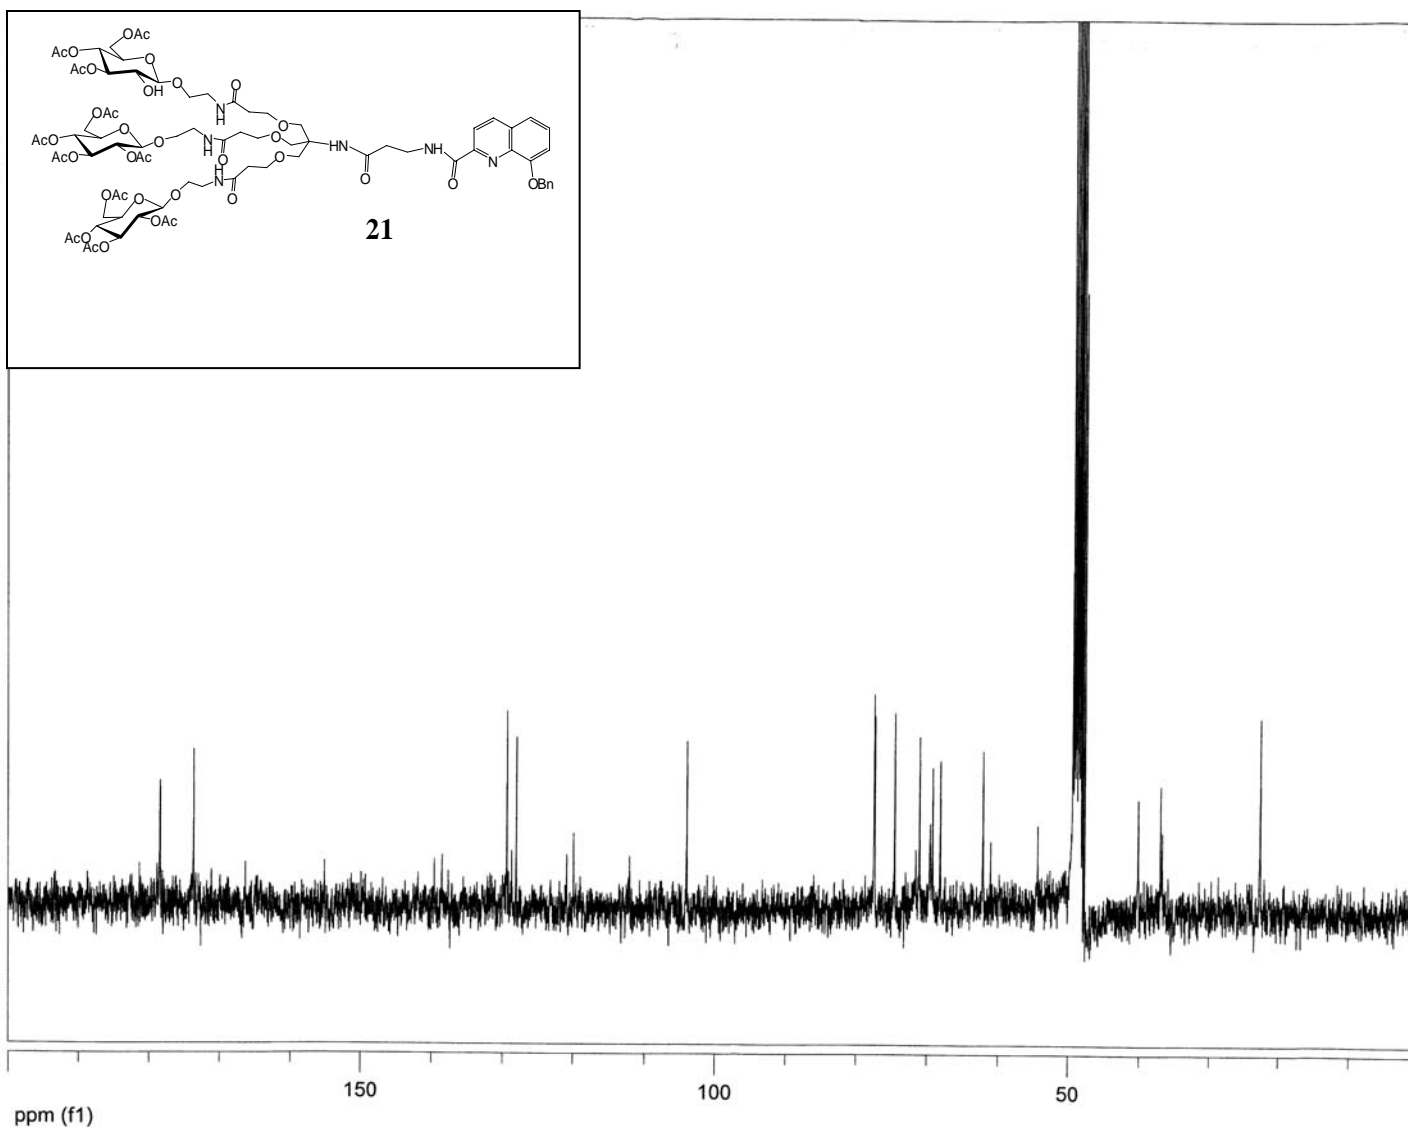

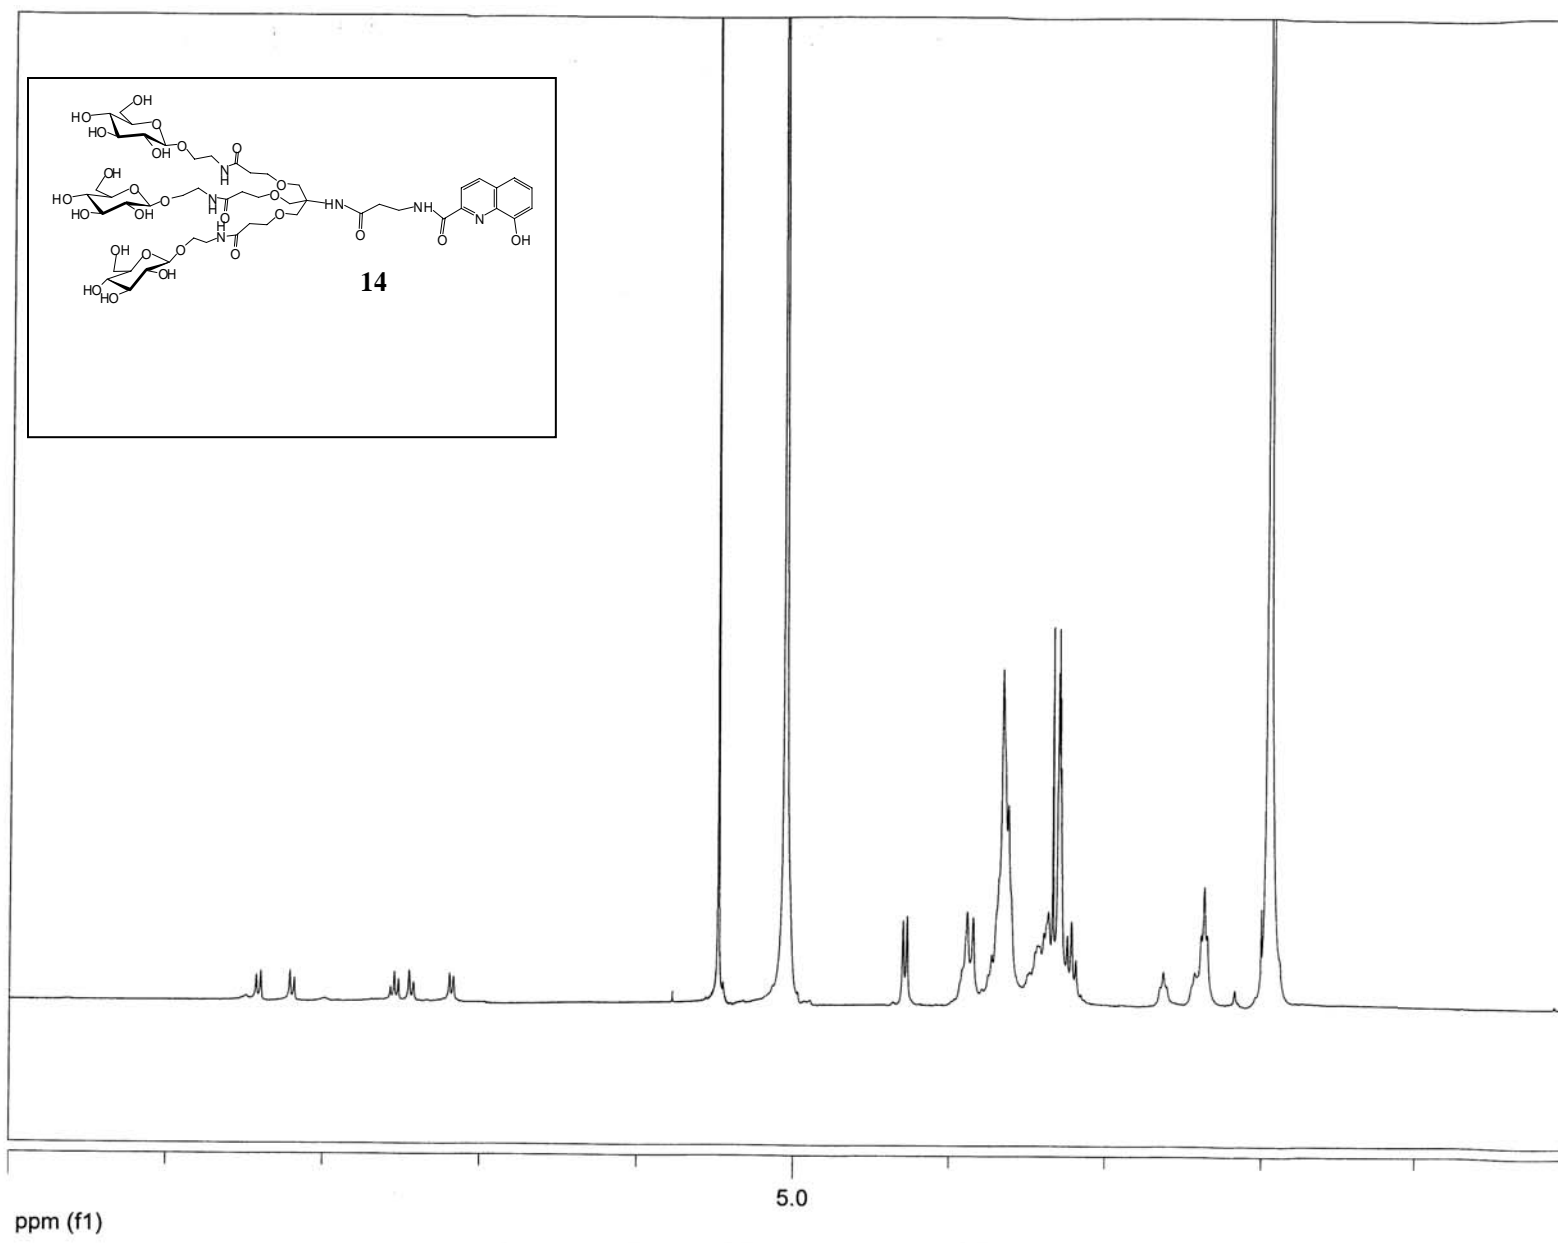

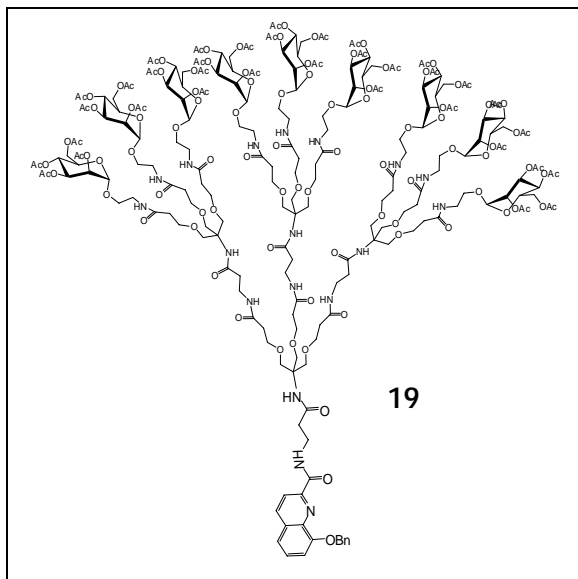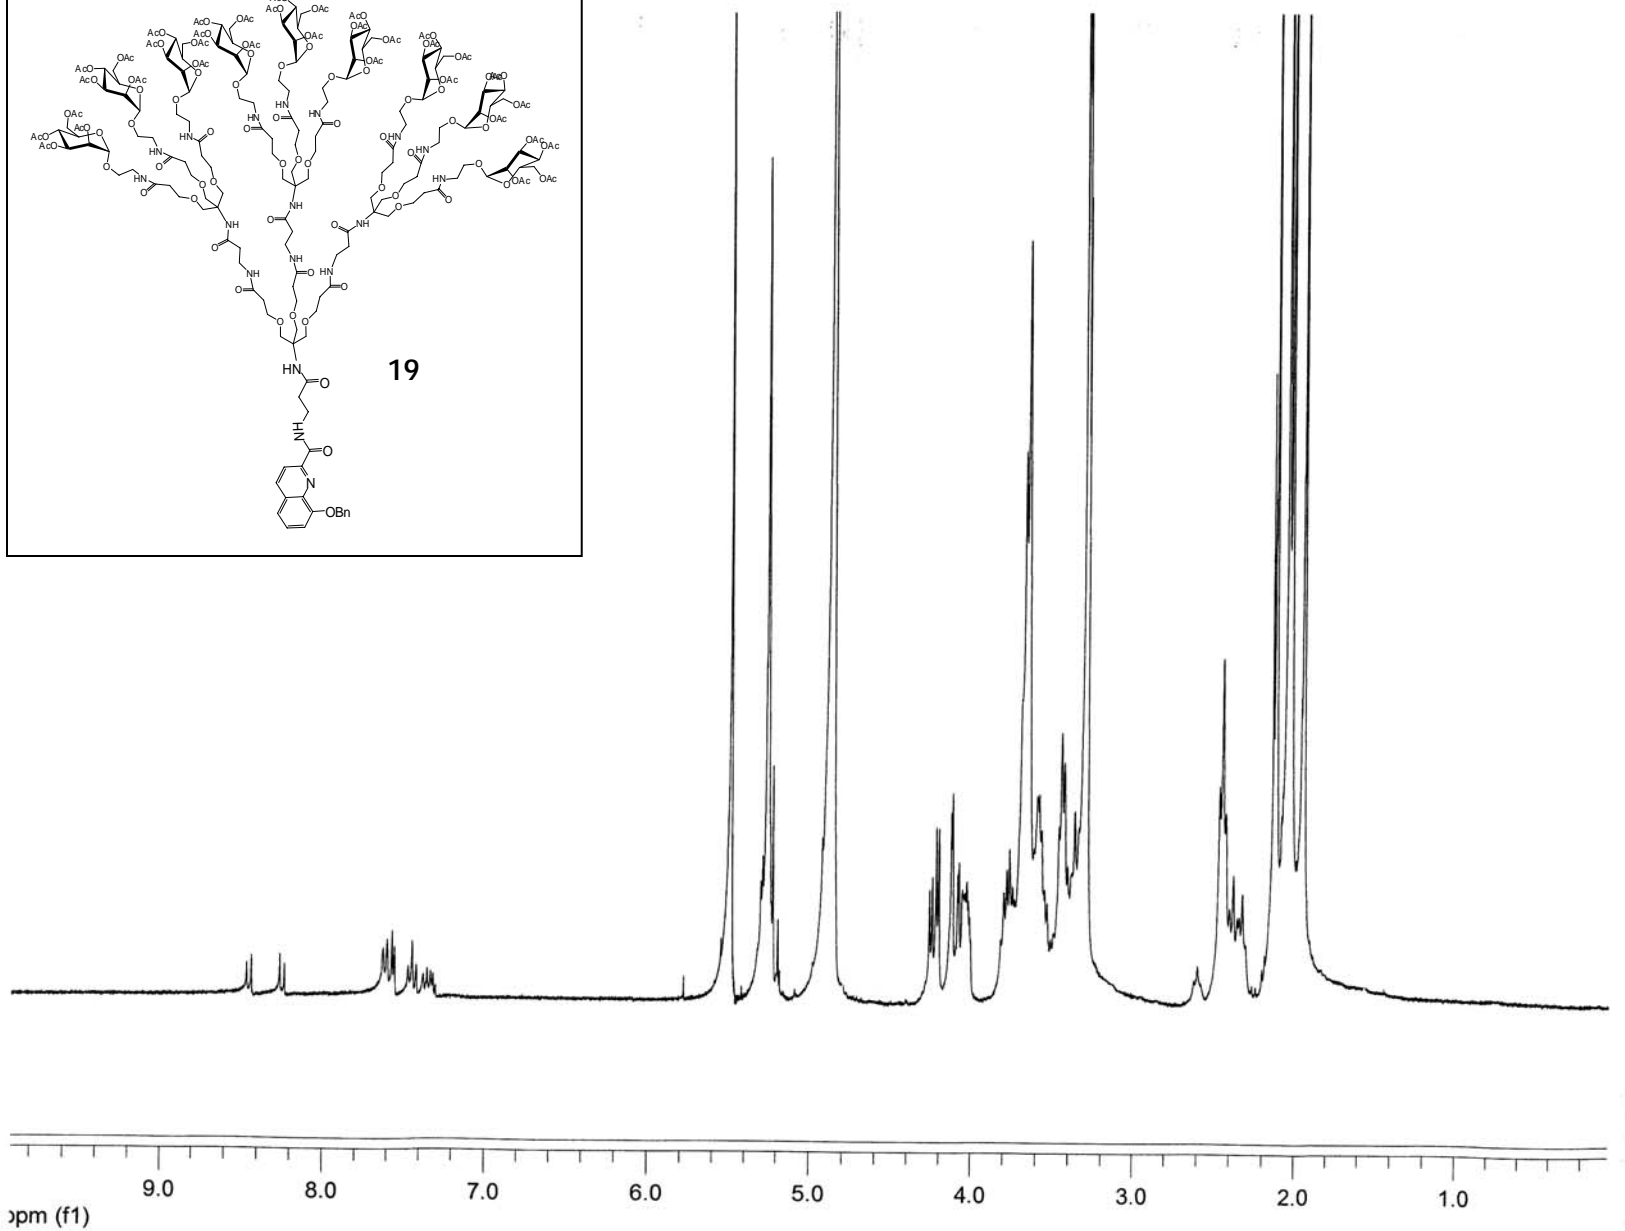



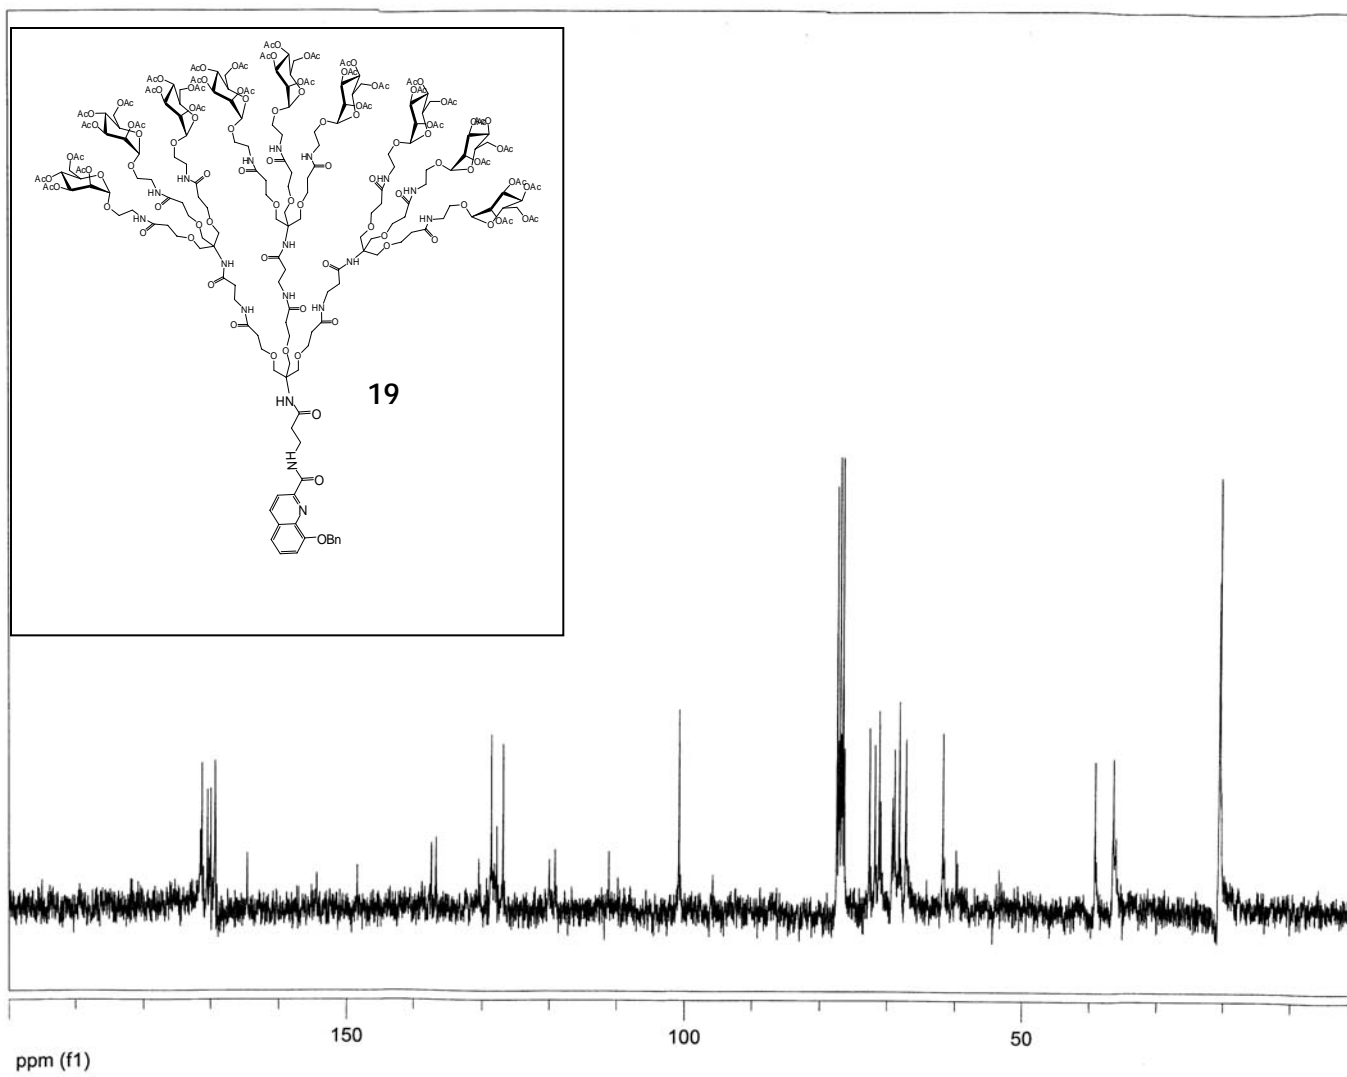

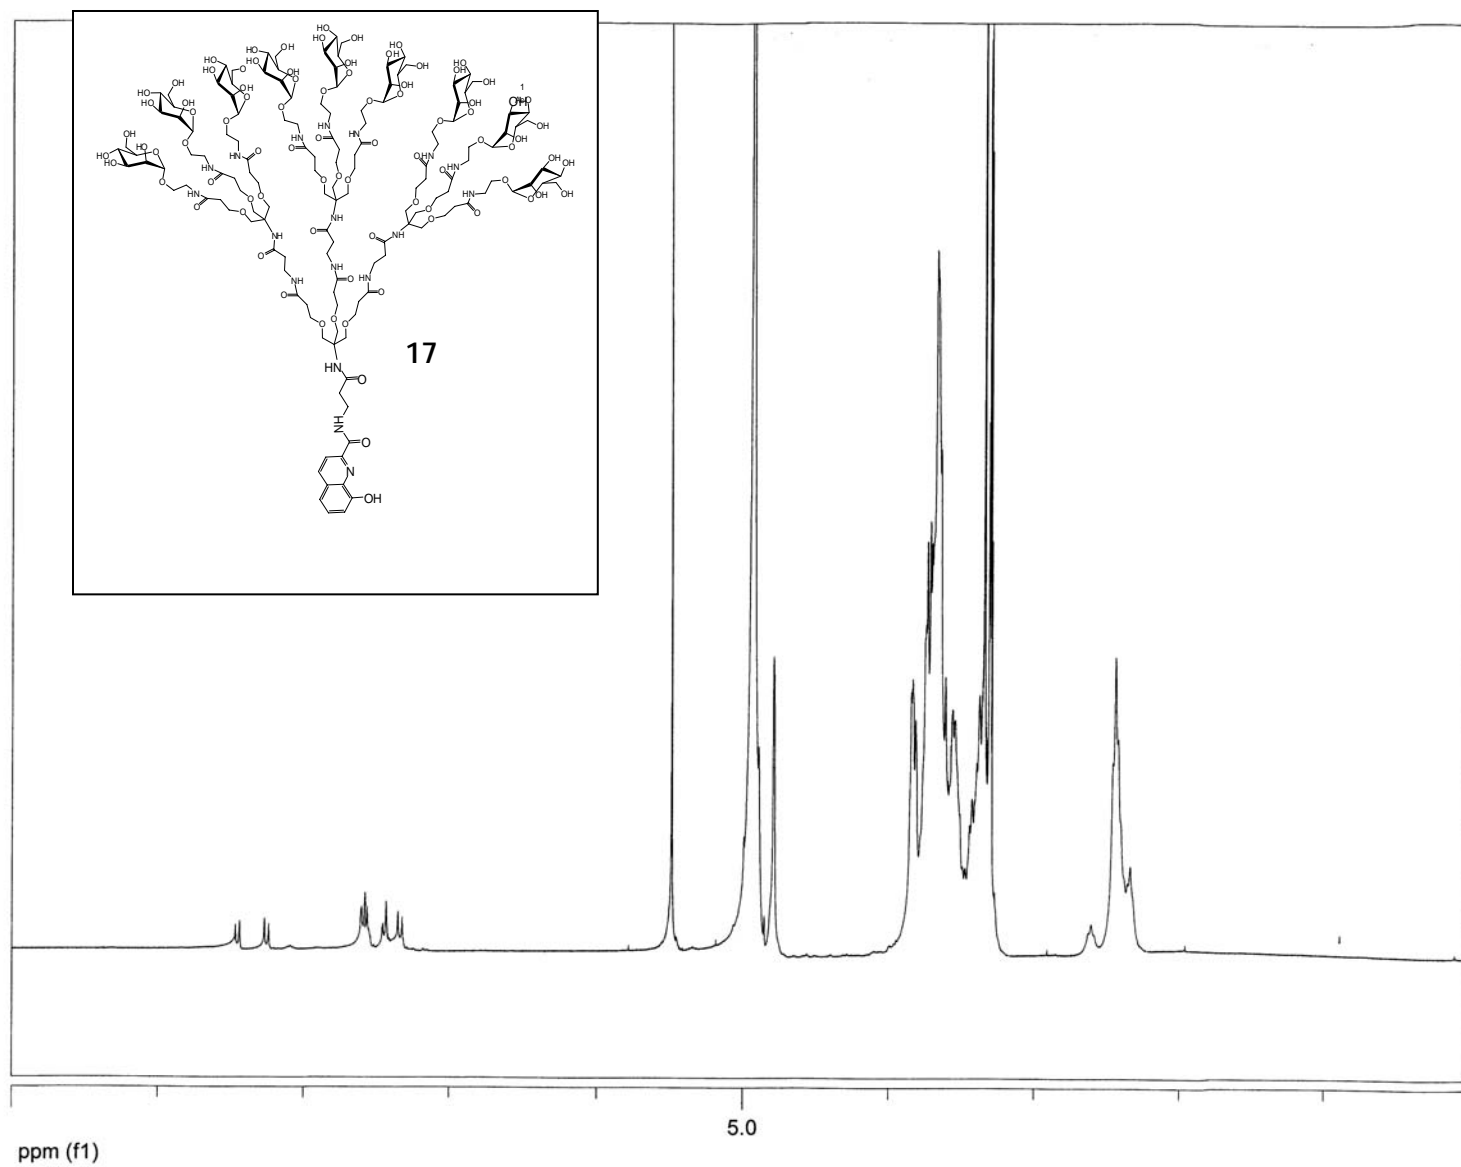

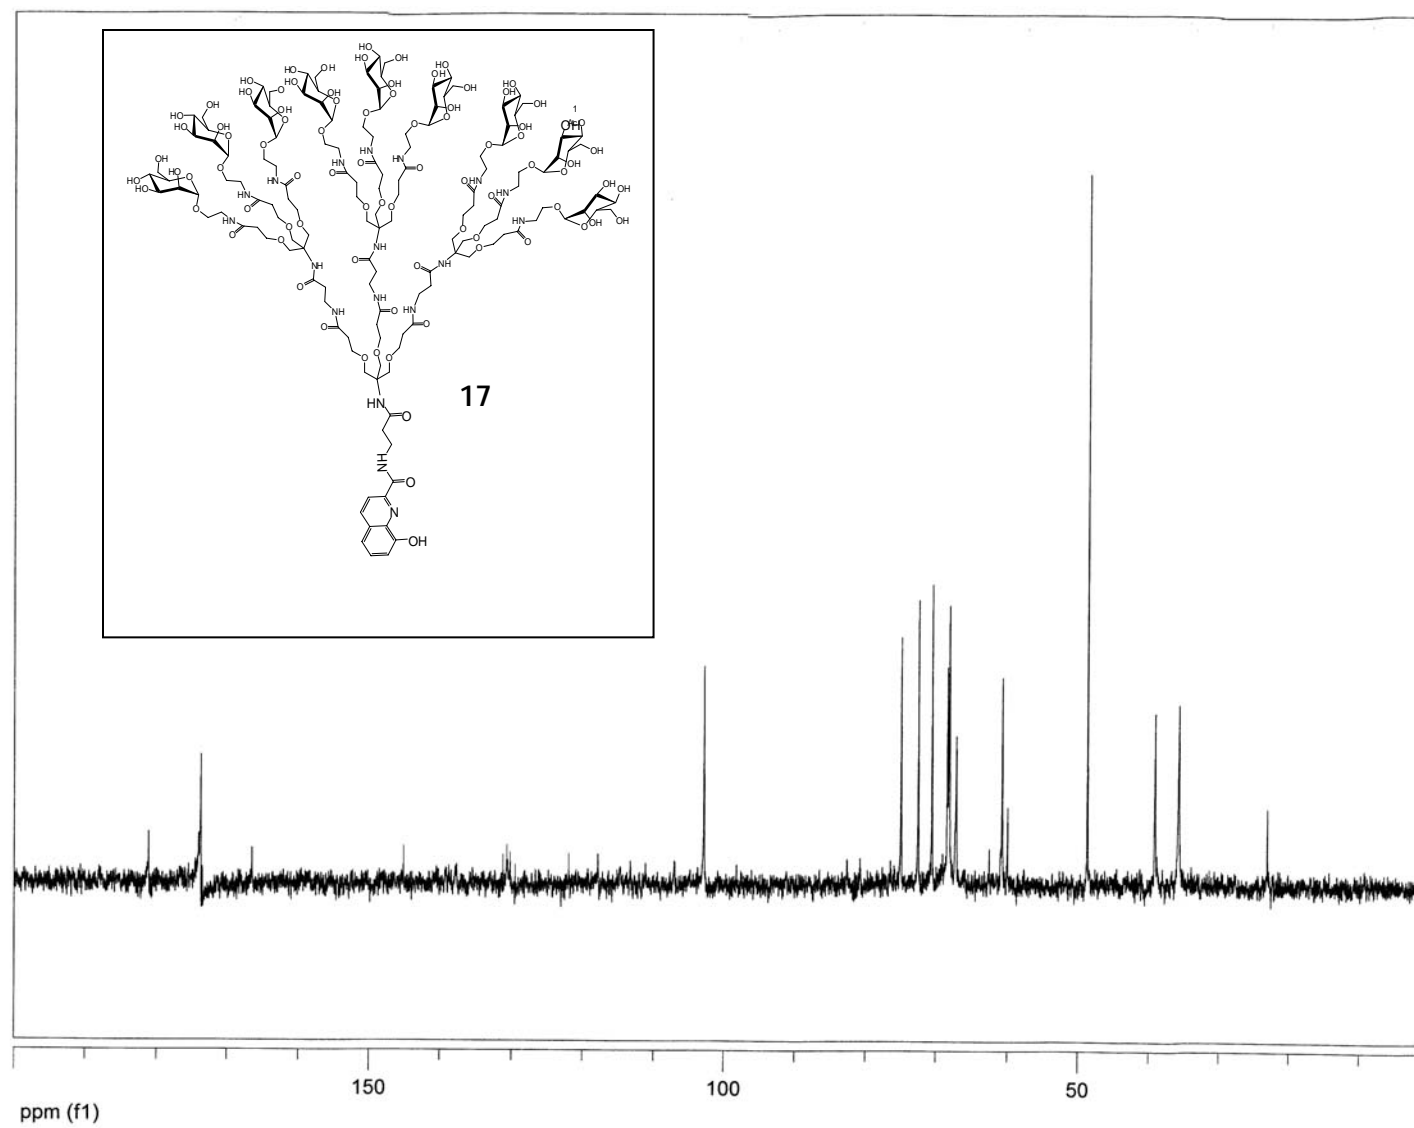

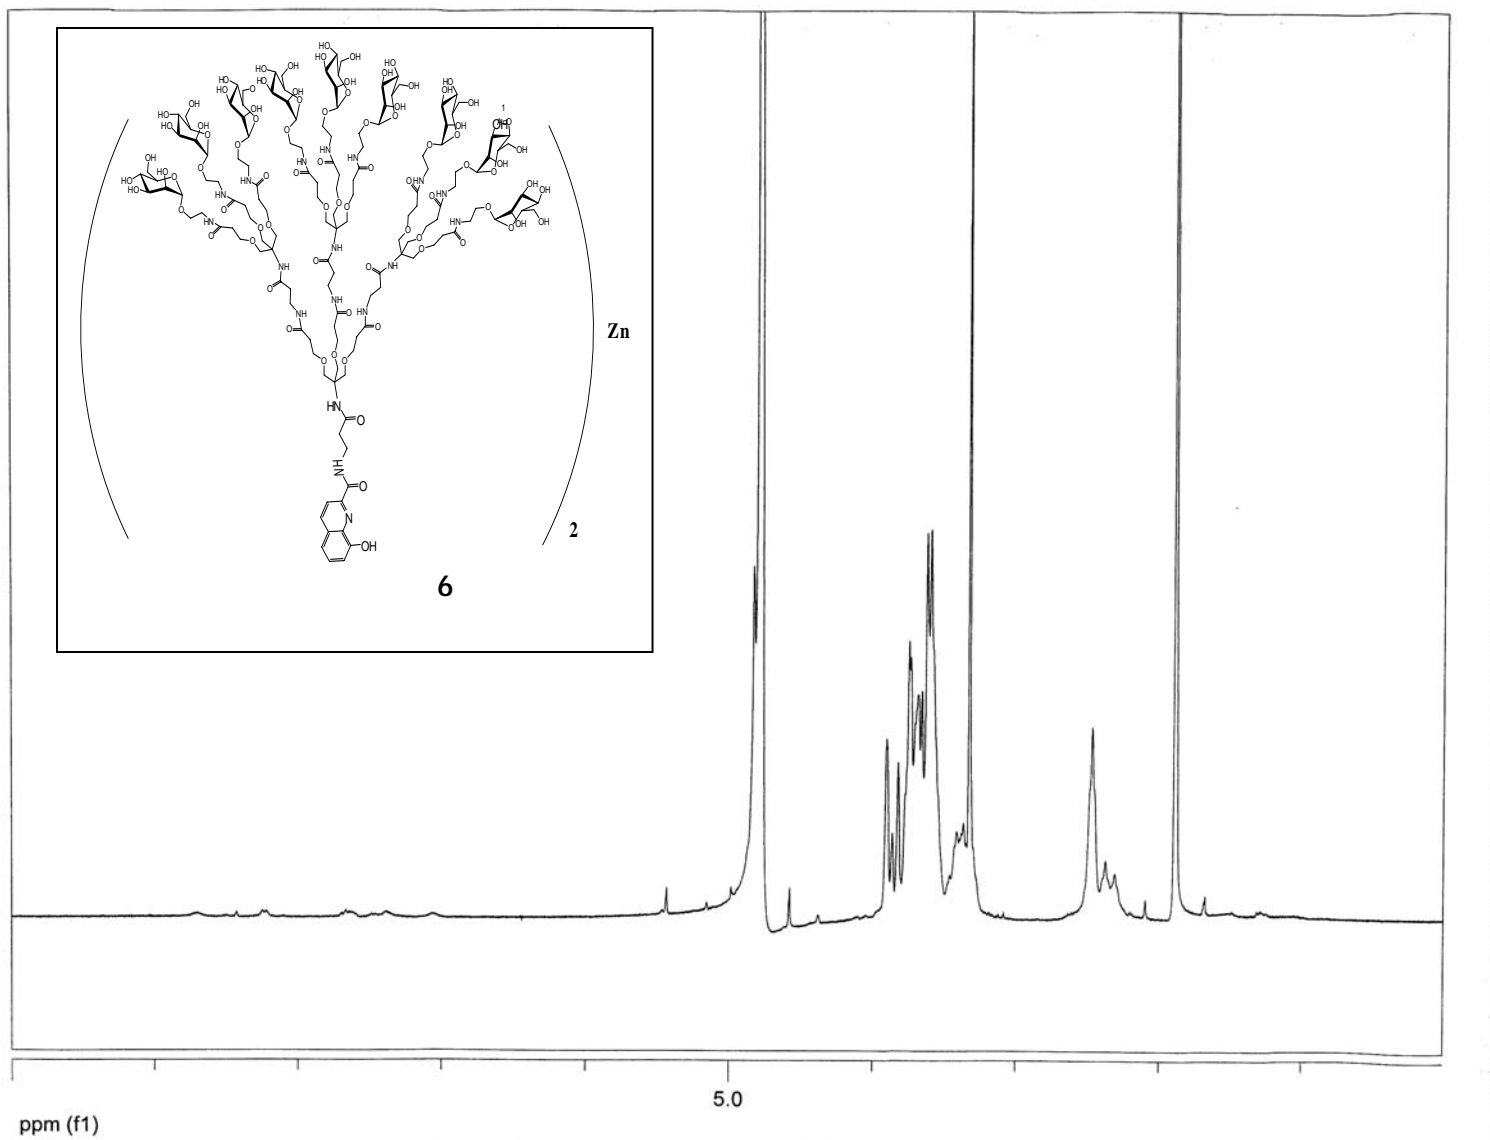

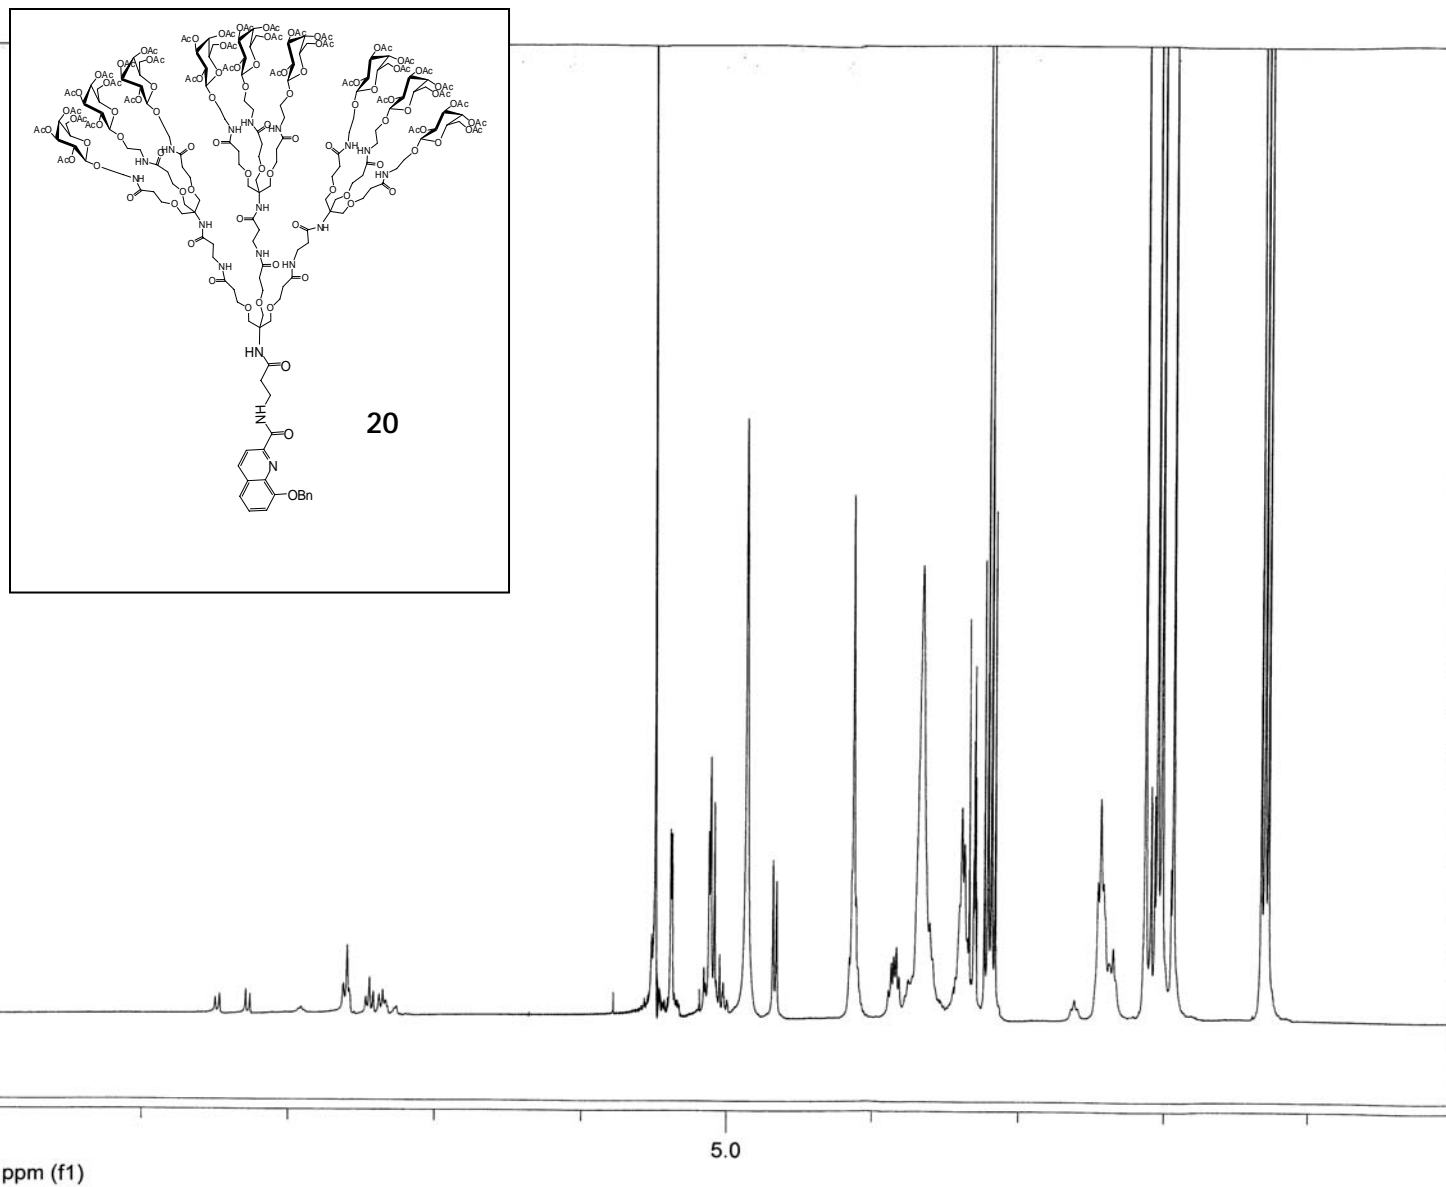

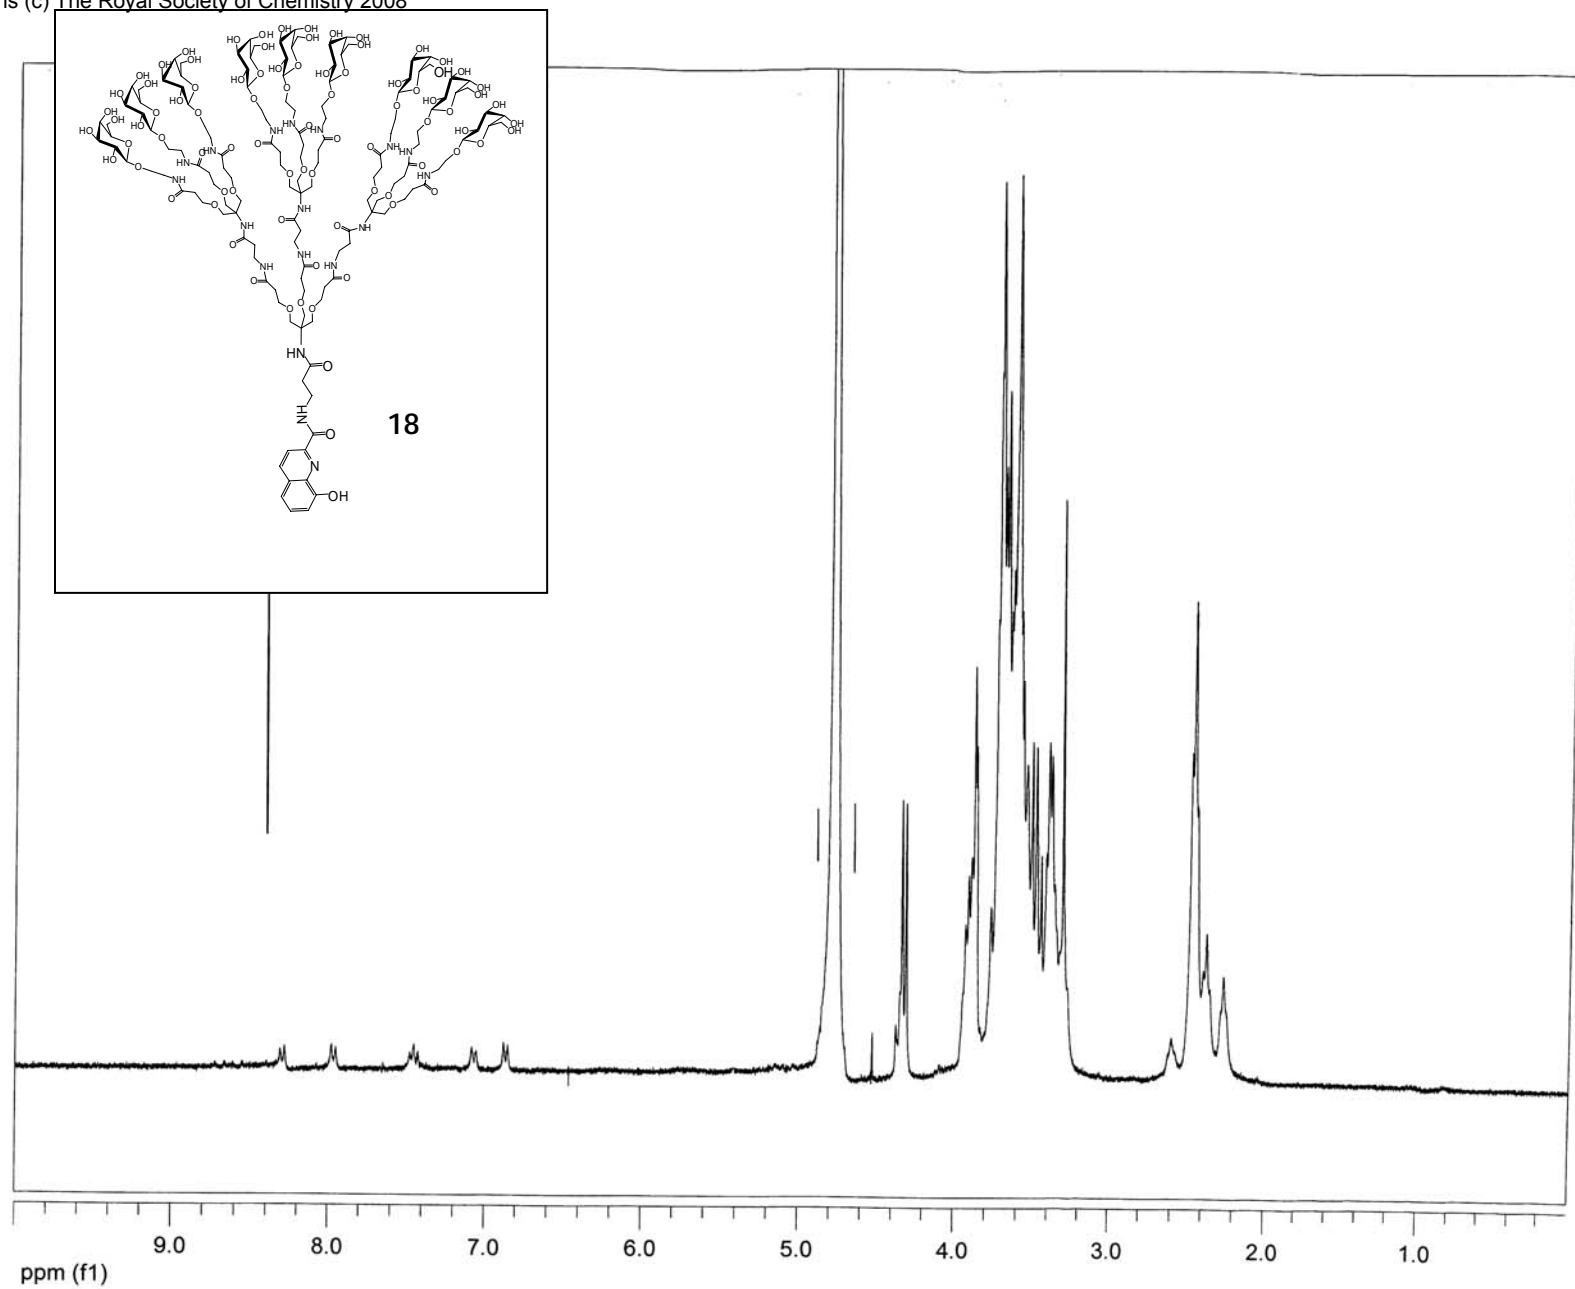

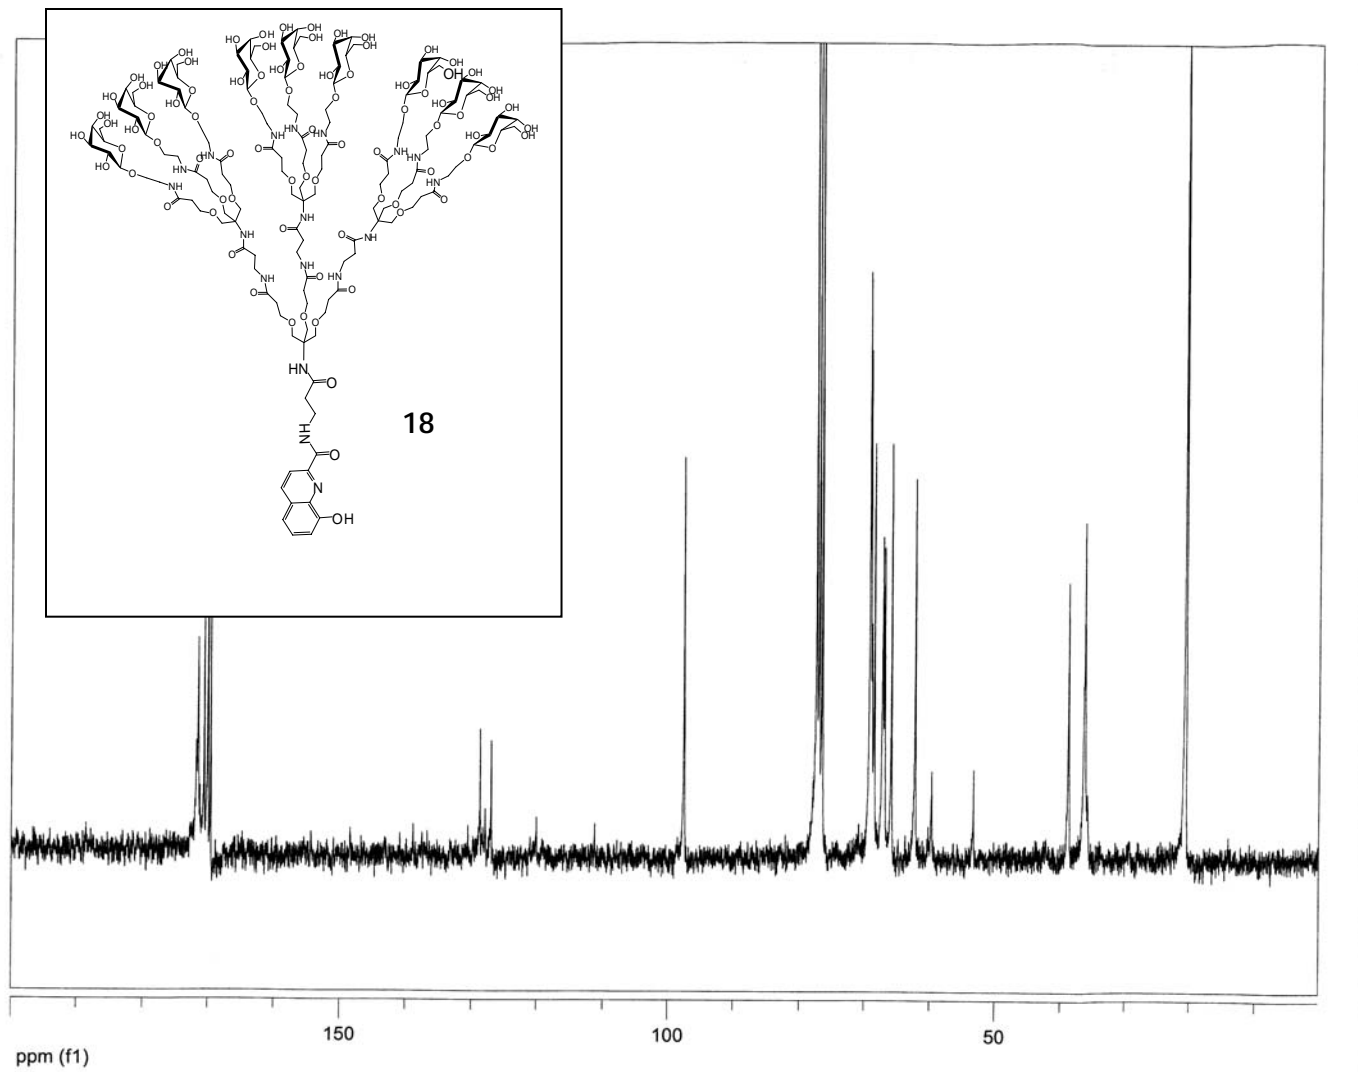

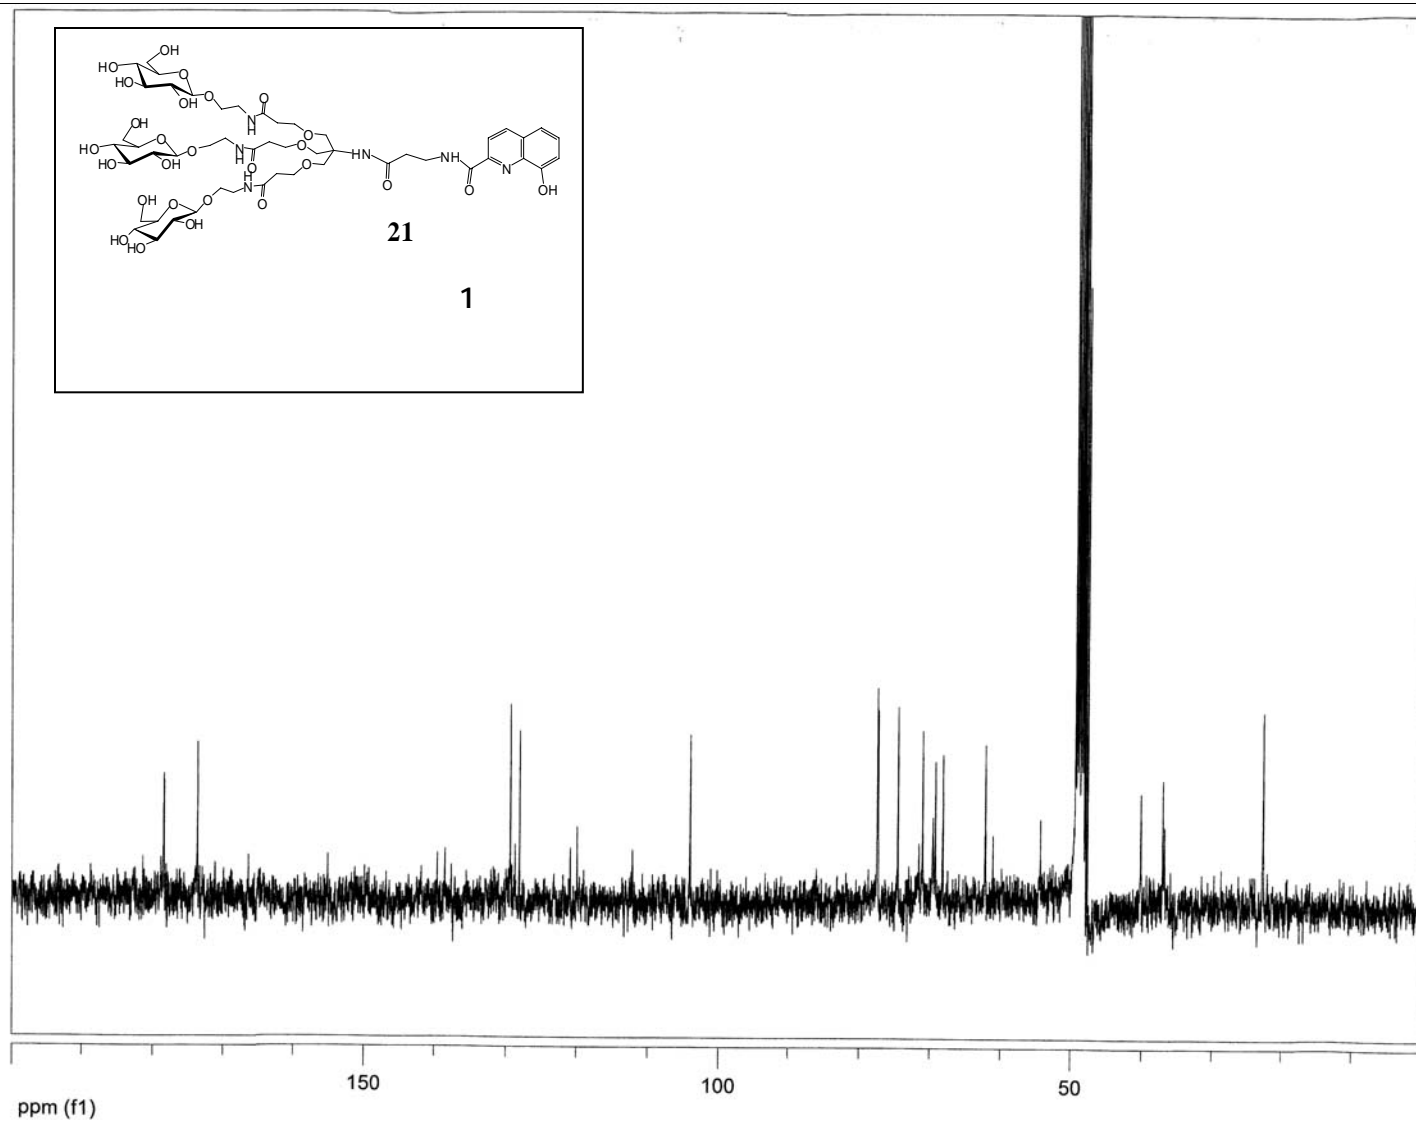

Supplement: b802177e1.pdf [file b802177e1.pdf]
